# Supplementary material for: Anti-inflammatory Activity of Tanshinone-Related Diterpenes from Perovskia artemisioides Roots
Source: PubMed Central journal article supplement (PMC10152488; doi:10.1021/acs.jnatprod.2c01004), 2023-04-11
Supplement: np2c01004_si_001.pdf [file np2c01004_si_001.pdf]

# **Anti-inflammatory Activity of Tanshinone-related Diterpenes from *Perovskia artemisioides* Roots**

Zahra Sadeghi,<sup>†,‡,§</sup> Antonietta Cerulli,<sup>‡,§</sup> Stefania Marzocco,<sup>‡</sup> Mahdi Moridi Farimani,<sup>†,\*</sup> Milena Masullo,<sup>‡</sup> and Sonia Piacente<sup>‡,\*</sup>

<sup>†</sup>Department of Phytochemistry, Medicinal Plants and Drugs Research Institute, Shahid Beheshti University, Evin, Tehran, Iran

<sup>‡</sup>Dipartimento di Farmacia, Università degli Studi di Salerno, via Giovanni Paolo II n. 132, 84084 Fisciano (SA), Italy

\*Corresponding authors:

Tel: +98 21 29904043. Fax: +98 21 22431783. E-mail address: m\_moridi@sbu.ac.ir

Tel.: +39 089969763; Fax:+39 089969602. E-mail address: piacente@unisa.it

## Supplementary materials

**Table S1.** Retention Times ( $R_t$ ),  $[M+H]^+$ ,  $[M+Na]^+$ , Molecular Formula,  $\Delta$  ppm and MS/MS Values of Compounds **1-25** of *n*-Hexane Extract of *P. artemisioides* roots by LC-ESI/LTQOrbitrap/MS.

**Figure S1.** ESI/LTQOrbitrap spectrum of compound **2**, in positive ion mode.

**Figure S2.**  $^1\text{H}$  NMR Spectrum (600 MHz,  $\text{CD}_3\text{OD}$ ) of compound **2**.

**Figure S3.**  $^{13}\text{C}$  Spectrum (150 MHz,  $\text{CD}_3\text{OD}$ ) of compound **2**.

**Figure S4.** HSQC Spectrum ( $\text{CD}_3\text{OD}$ ) of compound **2**.

**Figure S5.** HMBC Spectrum ( $\text{CD}_3\text{OD}$ ) of compound **2**.

**Figure S6.** COSY Spectrum ( $\text{CD}_3\text{OD}$ ) of compound **2**.

**Figure S7.** ROESY Spectrum ( $\text{CD}_3\text{OD}$ ) of compound **2**.

**Figure S8.** ESI/LTQOrbitrap spectrum of compound **9**, in positive ion mode.

**Figure S9.**  $^1\text{H}$  NMR Spectrum (600 MHz,  $\text{CD}_3\text{OD}$ ) of compound **9**.

**Figure S10.**  $^{13}\text{C}$  Spectrum (150 MHz,  $\text{CD}_3\text{OD}$ ) of compound **9**.

**Figure S11.** HSQC Spectrum ( $\text{CD}_3\text{OD}$ ) of compound **9**.

**Figure S12.** HMBC Spectrum ( $\text{CD}_3\text{OD}$ ) of compound **9**.

**Figure S13.** COSY Spectrum ( $\text{CD}_3\text{OD}$ ) of compound **9**.

**Figure S14.** ROESY Spectrum ( $\text{CD}_3\text{OD}$ ) of compound **9**.

**Figure S15.** ESI/LTQOrbitrap spectrum of compound **10**, in positive ion mode.

**Figure S16.**  $^1\text{H}$  NMR Spectrum (600 MHz,  $\text{CD}_3\text{OD}$ ) of compound **10**.

**Figure S17.**  $^{13}\text{C}$  Spectrum (150 MHz,  $\text{CD}_3\text{OD}$ ) of compound **10**.

**Figure S18.** HSQC Spectrum ( $\text{CD}_3\text{OD}$ ) of compound **10**.

**Figure S19.** HMBC Spectrum ( $\text{CD}_3\text{OD}$ ) of compound **10**.

**Figure S20.** COSY Spectrum ( $\text{CD}_3\text{OD}$ ) of compound **10**.

**Figure S22.** ESI/LTQOrbitrap spectrum of compound **11**, in negative ion mode.

**Figure S23.**  $^1\text{H}$  NMR Spectrum (600 MHz,  $\text{CD}_3\text{OD}$ ) of compound **11**.

**Figure S24.**  $^{13}\text{C}$  Spectrum (150 MHz,  $\text{CD}_3\text{OD}$ ) of compound **11**.

**Figure S25.** HSQC Spectrum (CD<sub>3</sub>OD) of compound **11**.

**Figure S26.** HMBC Spectrum (CD<sub>3</sub>OD) of compound **11**.

**Figure S27.** COSY Spectrum (CD<sub>3</sub>OD) of compound **11**.

**Figure S28.** ROESY Spectrum (CD<sub>3</sub>OD) of compound **11**.

**Figure S29.** ESI/LTQOrbitrap spectrum of compound **16**, in negative ion mode.

**Figure S30.** <sup>1</sup>H NMR Spectrum (600 MHz, CD<sub>3</sub>OD) of compound **16**.

**Figure S31.** <sup>13</sup>C Spectrum (150 MHz, CD<sub>3</sub>OD) of compound **16**.

**Figure S32.** HSQC Spectrum (CD<sub>3</sub>OD) of compound **16**.

**Figure S33.** HMBC Spectrum (CD<sub>3</sub>OD) of compound **16**.

**Figure S34.** COSY Spectrum (CD<sub>3</sub>OD) of compound **16**.

**Figure S36.** <sup>1</sup>H NMR Spectrum (600 MHz, CD<sub>3</sub>OD) of compound **20**.

**Figure S37.** <sup>1</sup>H NMR Spectrum (600 MHz, CD<sub>3</sub>OD) of compound **20**.

**Figure S38.** <sup>13</sup>C Spectrum (150 MHz, CD<sub>3</sub>OD) of compound **20**.

**Figure S39.** HSQC Spectrum (CD<sub>3</sub>OD) of compound **20**.

**Figure S40.** HMBC Spectrum (CD<sub>3</sub>OD) of compound **20**.

**Figure S41.** COSY Spectrum (CD<sub>3</sub>OD) of compound **20**.

**Table S1.** Retention Times ( $R_t$ ),  $[M+H]^+$ ,  $[M+Na]^+$ , Molecular Formula,  $\Delta$  ppm, and MS/MS Values of Compounds **1-25** of *n*-Hexane Extract of *P. artemisioides* roots by LC-ESI/LTQOrbitrap/MS.

|           | $R_t$ | $[M+H]^+$ | Mol Formula                                    | $\Delta$ ppm | MS/MS              | Name                                      |
|-----------|-------|-----------|------------------------------------------------|--------------|--------------------|-------------------------------------------|
| <b>1</b>  | 3.52  | 327.1218  | C <sub>19</sub> H <sub>18</sub> O <sub>5</sub> | -2.69        | 309, 283           | castanol A                                |
| <b>2</b>  | 5.02  | 313.1423  | C <sub>19</sub> H <sub>20</sub> O <sub>4</sub> | -3.72        | 269, 294, 252      | 1 $\beta$ -hydroxy-isocryptotanshinone    |
| <b>3</b>  | 7.73  | 311.1270  | C <sub>19</sub> H <sub>18</sub> O <sub>4</sub> | -2.40        | 265, 283, 293      | 1-oxocryptotanshinone                     |
| <b>4</b>  | 10.41 | 329.1374  | C <sub>19</sub> H <sub>20</sub> O <sub>5</sub> | -2.92        | 314, 267           | 15 hydroxy-anhydride-16R cryptotanshinone |
| <b>5</b>  | 10.74 | 311.1269  | C <sub>19</sub> H <sub>18</sub> O <sub>4</sub> | -2.59        | 265, 281, 293      | 1 $\alpha$ -hydroxytanshinone             |
| <b>6</b>  | 12.86 | 309.1112  | C <sub>19</sub> H <sub>16</sub> O <sub>4</sub> | -2.90        | 281, 263, 235      | 1-oxotanshinone IIA                       |
| <b>7</b>  | 13.25 | 317.2104  | C <sub>20</sub> H <sub>28</sub> O <sub>3</sub> | -2.21        | 299, 273, 213      | 1,14-dihydroxy-8,11,13-abietatrien-7-one  |
| <b>8</b>  | 14.73 | 315.1579  | C <sub>19</sub> H <sub>22</sub> O <sub>4</sub> | -3.57        | 297, 241           | miltiorin D                               |
| <b>9</b>  | 15.03 | 331.1534  | C <sub>19</sub> H <sub>22</sub> O <sub>5</sub> | -1.96        |                    | perovskin A                               |
| <b>10</b> | 15.51 | 345.1685  | C <sub>20</sub> H <sub>24</sub> O <sub>5</sub> | -3.45        | 327, 313, 179, 123 | perovskin B                               |
| <b>11</b> | 16.00 | 287.1332  | C <sub>18</sub> H <sub>22</sub> O <sub>3</sub> | -0.96        | 269, 217           | perovskin C                               |
| <b>12</b> | 16.39 | 241.1584  | C <sub>17</sub> H <sub>20</sub> O              |              |                    | 12-hydroxy-16,17-bis-nor-simonellite      |
| <b>13</b> | 16.67 | 317.2102  | C <sub>20</sub> H <sub>29</sub> O <sub>3</sub> | -2.78        | 299, 271, 199      | demethylsalvican-11,12-dione              |
| <b>14</b> | 16.69 | 273.1844  | C <sub>18</sub> H <sub>24</sub> O <sub>2</sub> | -1.89        |                    | przewalskin                               |
| <b>15</b> | 17.52 | 313.1430  | C <sub>19</sub> H <sub>20</sub> O <sub>4</sub> | -1.26        | 295, 267, 243      | 1 $\beta$ -hydroxycryptotanshinone        |
| <b>16</b> | 18.07 | 271.1684  | C <sub>18</sub> H <sub>22</sub> O <sub>2</sub> | -3.05        | 229, 201           | perovskin D                               |
| <b>17</b> | 19.32 | 303.1945  | C <sub>20</sub> H <sub>30</sub> O <sub>2</sub> |              | 203, 189, 161      | pisiferol                                 |
| <b>18</b> | 20.02 | 297.1481  | C <sub>19</sub> H <sub>20</sub> O <sub>3</sub> | -1.42        | 279, 251           | cryptotanshinone                          |
| <b>19</b> | 20.62 | 301.2154  | C <sub>20</sub> H <sub>28</sub> O <sub>2</sub> | -2.71        | 259, 163, 173      | 11-hydroxyabieta-8,11,13-trien-7-one      |
| <b>20</b> | 22.11 | 329.1739  | C <sub>20</sub> H <sub>24</sub> O <sub>4</sub> | -2.66        | 315, 297, 241      | 12- <i>O</i> -methyl-miltiorin D          |
| <b>21</b> | 23.26 | 287.1633  | C <sub>18</sub> H <sub>22</sub> O <sub>3</sub> | -3.033       | 269                | epicryptoacetalide                        |
| <b>22</b> | 23.34 | 315.1945  | C <sub>20</sub> H <sub>27</sub> O <sub>3</sub> | -2.92        | 205, 179           | montbretol                                |
| <b>23</b> | 24.97 | 317.2101  | C <sub>20</sub> H <sub>28</sub> O <sub>3</sub> | -3.19        | 299, 27            | 6-deoxy-salviphomone                      |
| <b>24</b> | 25.25 | 299.1630  | C <sub>19</sub> H <sub>23</sub> O <sub>3</sub> | -3.71        |                    | miltiodiol                                |
| <b>25</b> | 26.19 | 269.1528  | C <sub>18</sub> H <sub>21</sub> O <sub>2</sub> | -0.78        |                    | salviolone                                |

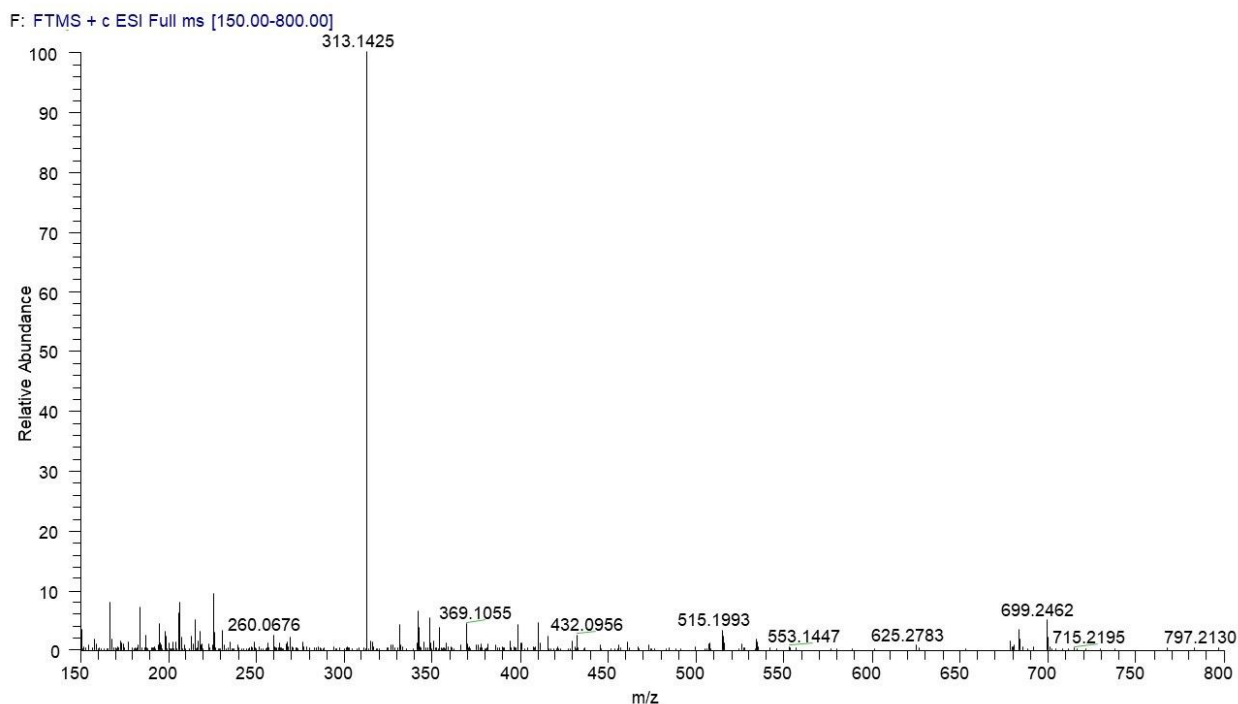

**Figure S1.** ESI/LTQOrbitrap spectrum of compound **2**, in positive ion mode.

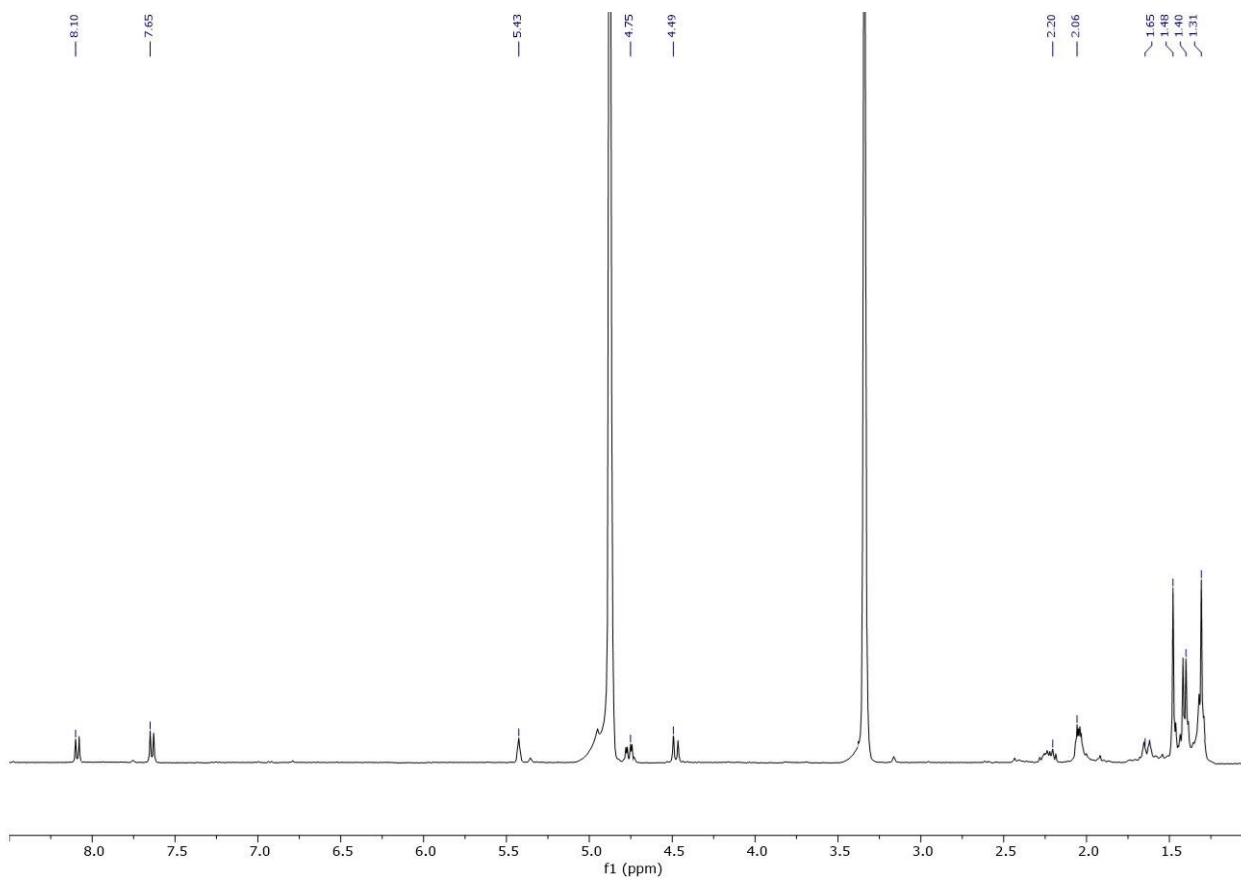

**Figure S2.**  $^1\text{H}$  NMR Spectrum (600 MHz,  $\text{CD}_3\text{OD}$ ) of compound **2**.

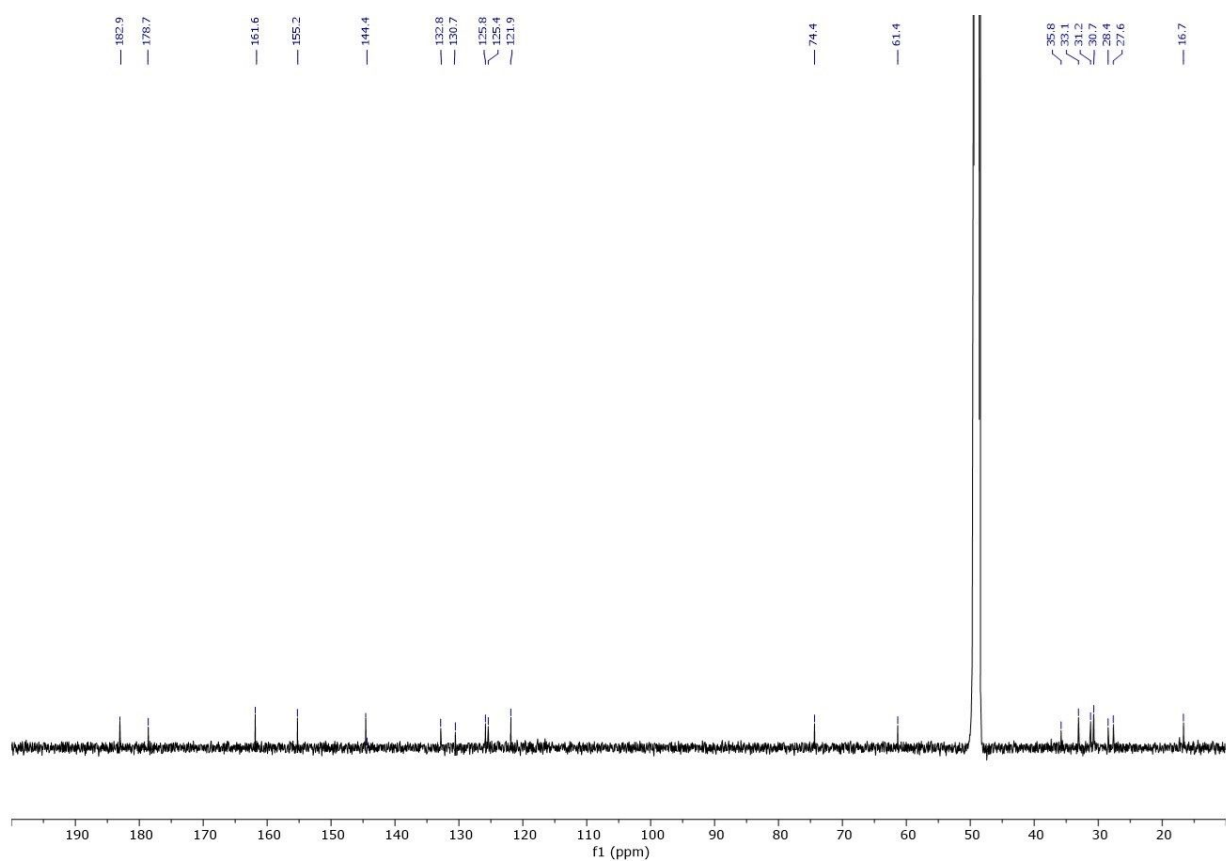

**Figure S3.**  $^{13}\text{C}$  Spectrum (150 MHz,  $\text{CD}_3\text{OD}$ ) of compound **2**.

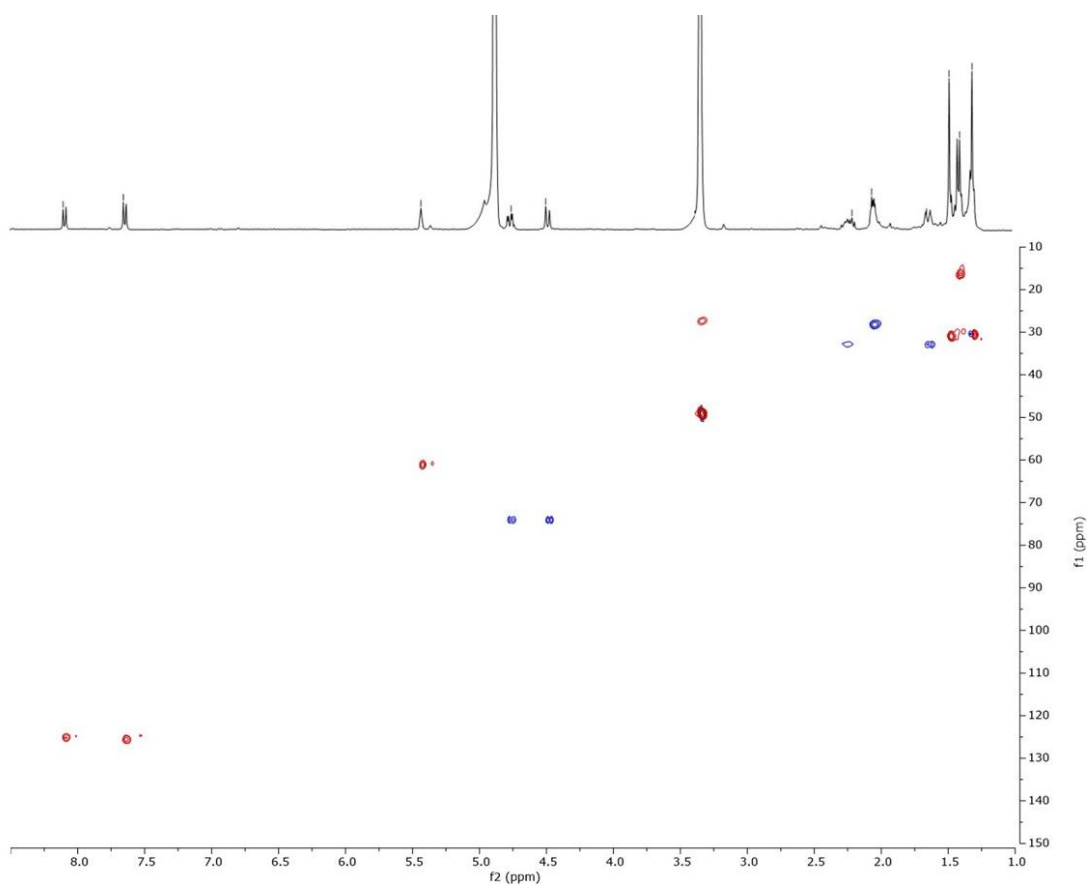

**Figure S4.** HSQC Spectrum (CD<sub>3</sub>OD) of compound **2**.

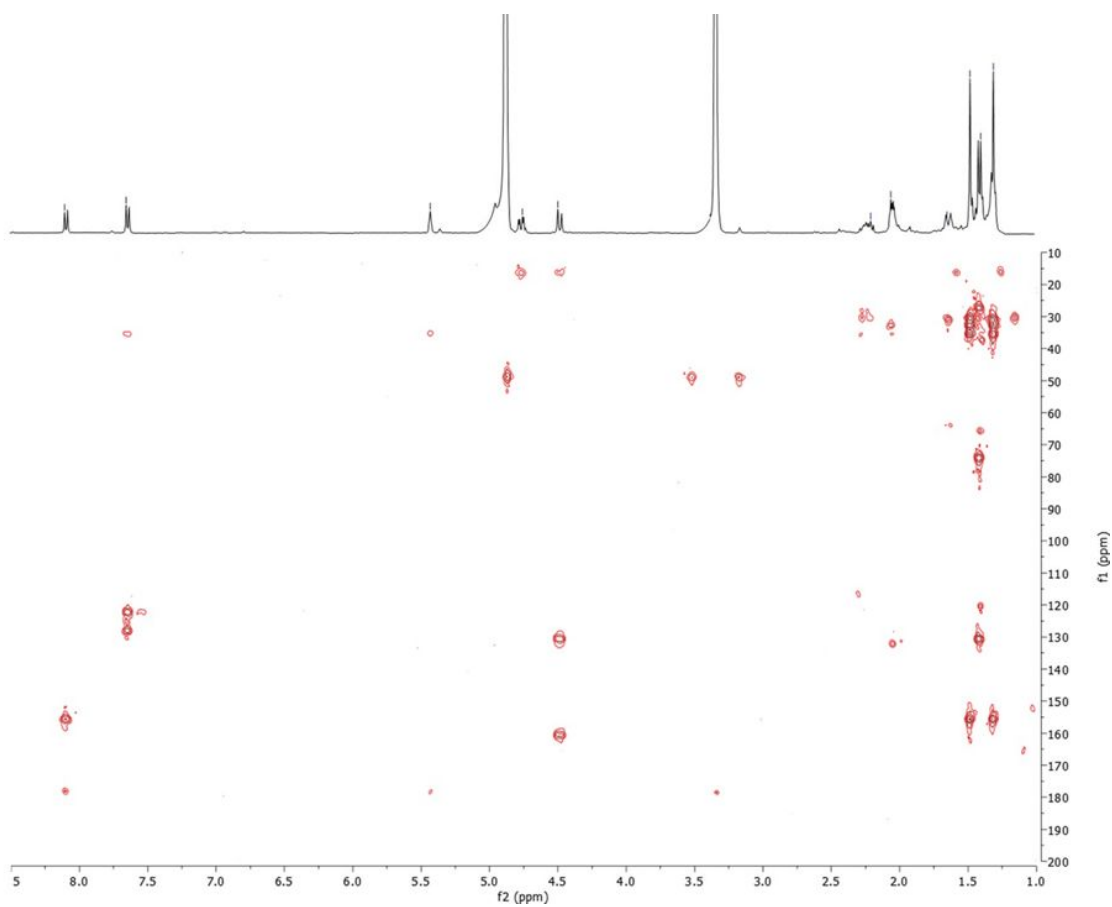

**Figure S5.** HMBC Spectrum (CD<sub>3</sub>OD) of compound **2**.

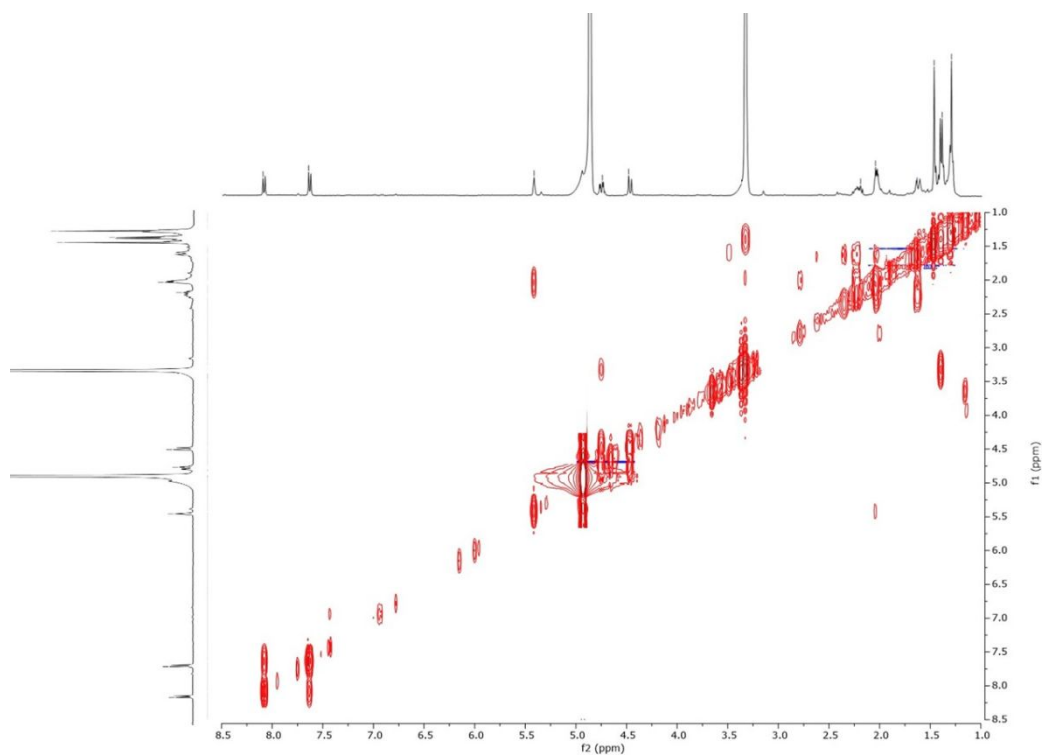

**Figure S6.** COSY Spectrum (CD<sub>3</sub>OD) of compound **2**.

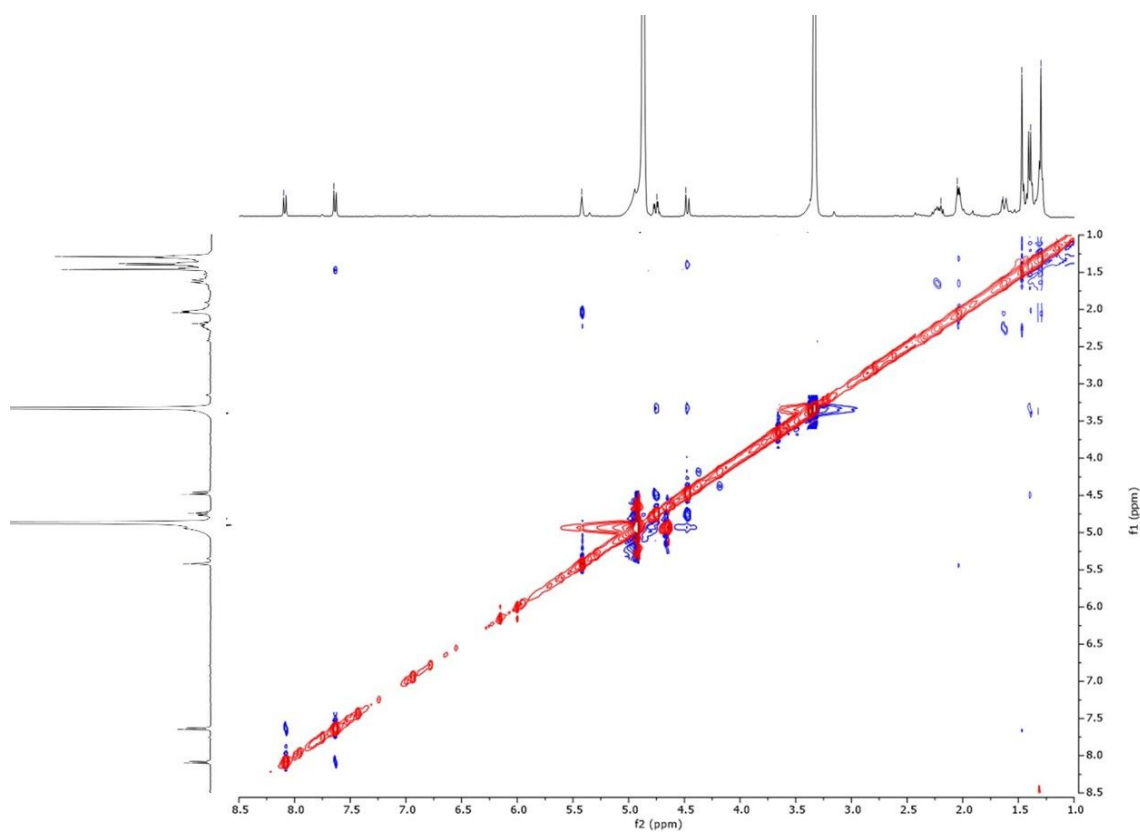

**Figure S7.** ROESY Spectrum ( $\text{CD}_3\text{OD}$ ) of compound **2**.

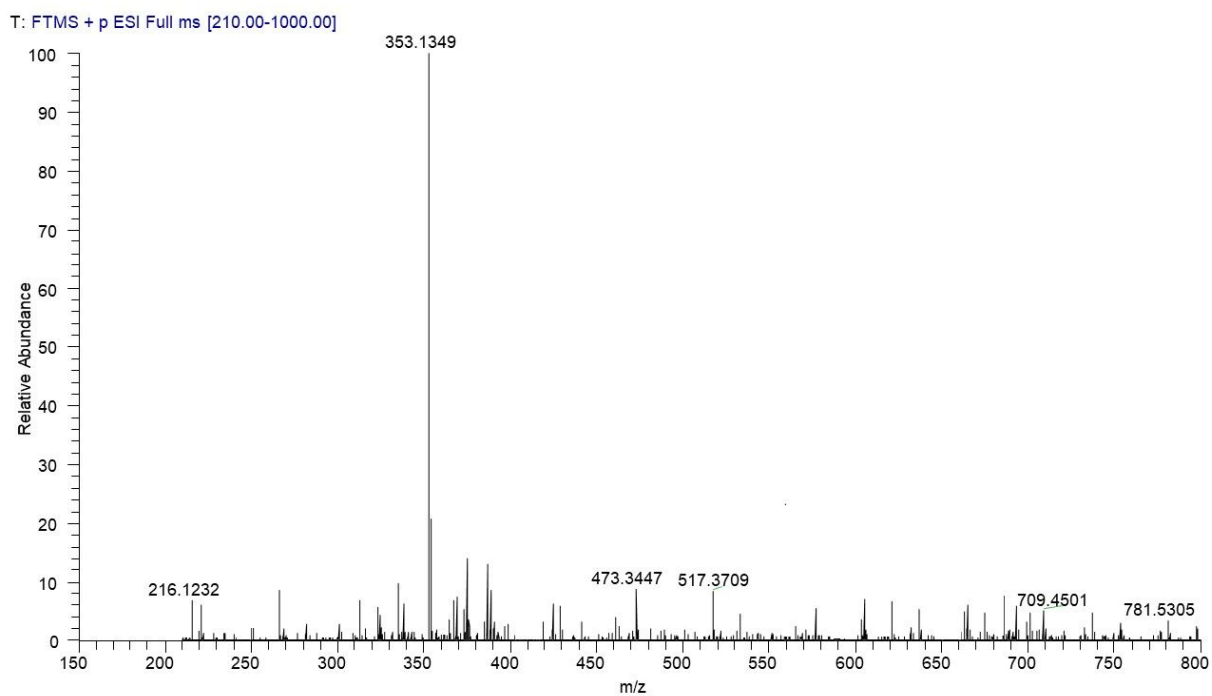

**Figure S8.** ESI/LTQOrbitrap spectrum of compound **9**, in positive ion mode.



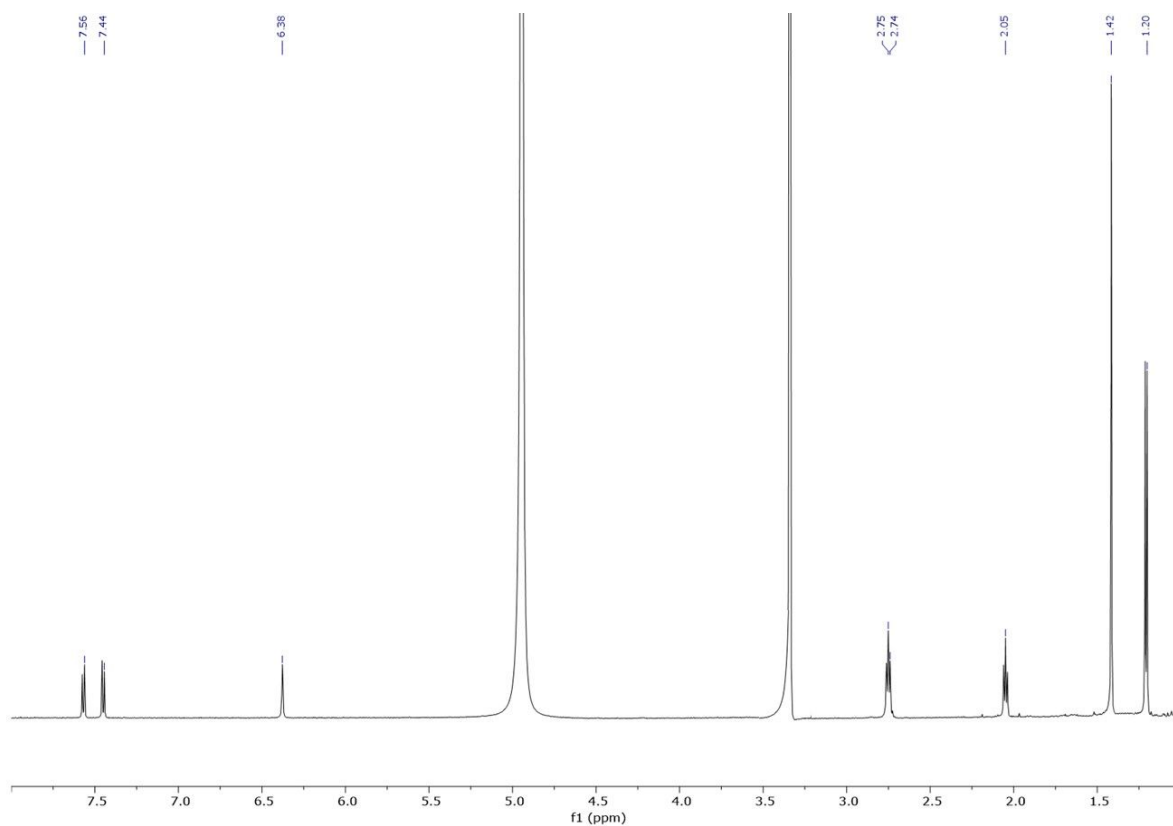

**Figure S9.**  $^1\text{H}$  NMR Spectrum (600 MHz,  $\text{CD}_3\text{OD}$ ) of compound **9**.

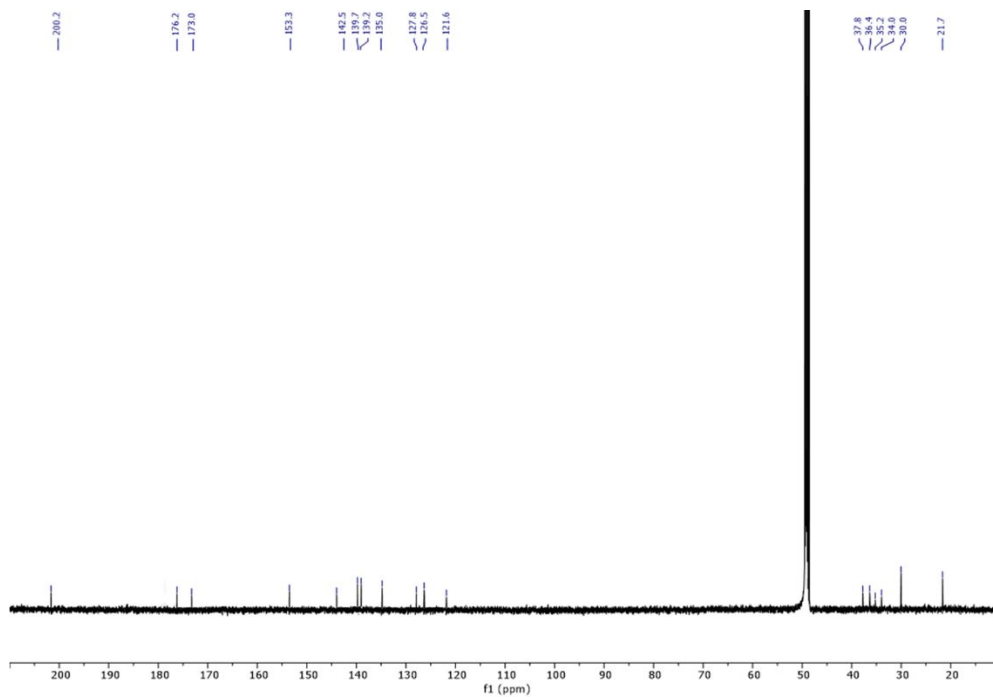

**Figure S10.**  $^{13}\text{C}$  Spectrum (150 MHz,  $\text{CD}_3\text{OD}$ ) of compound **9**.

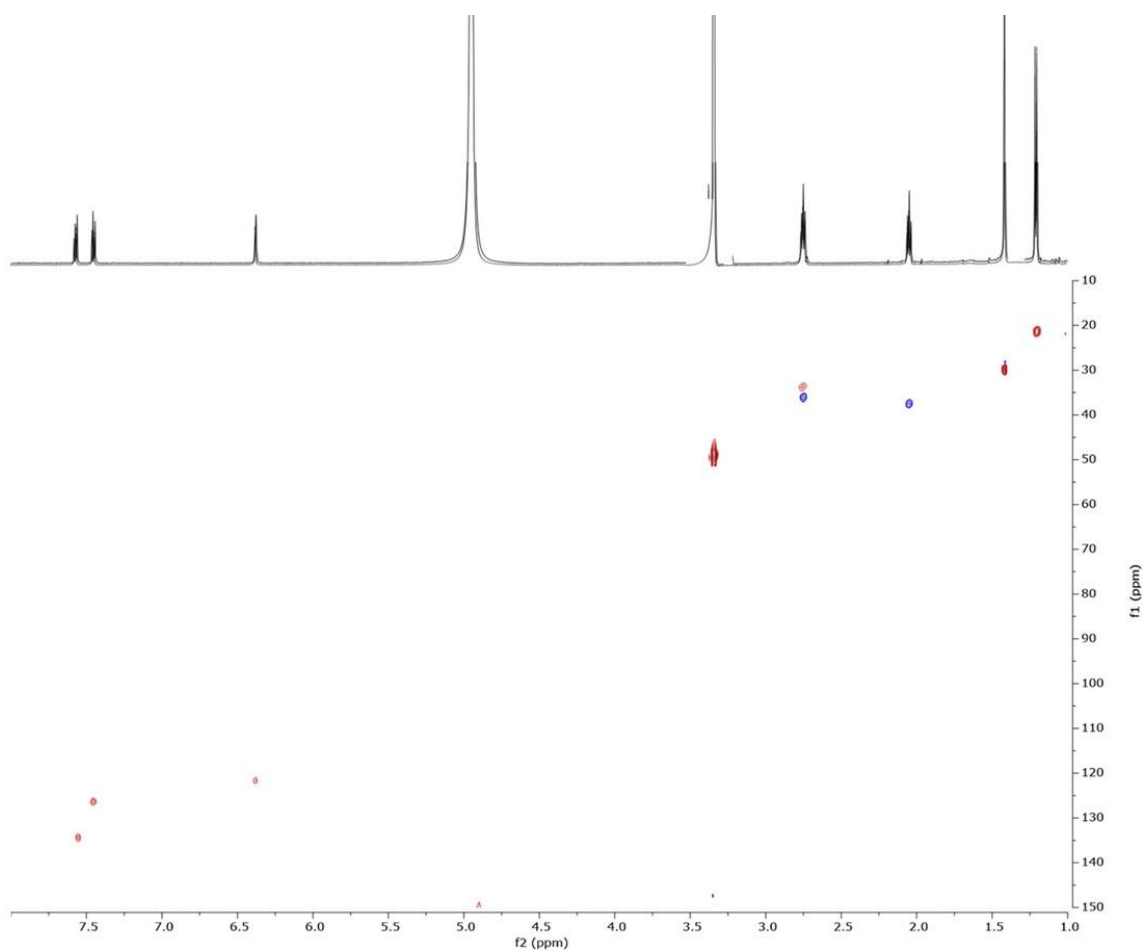

**Figure S11.** HSQC Spectrum (CD<sub>3</sub>OD) of compound **9**.

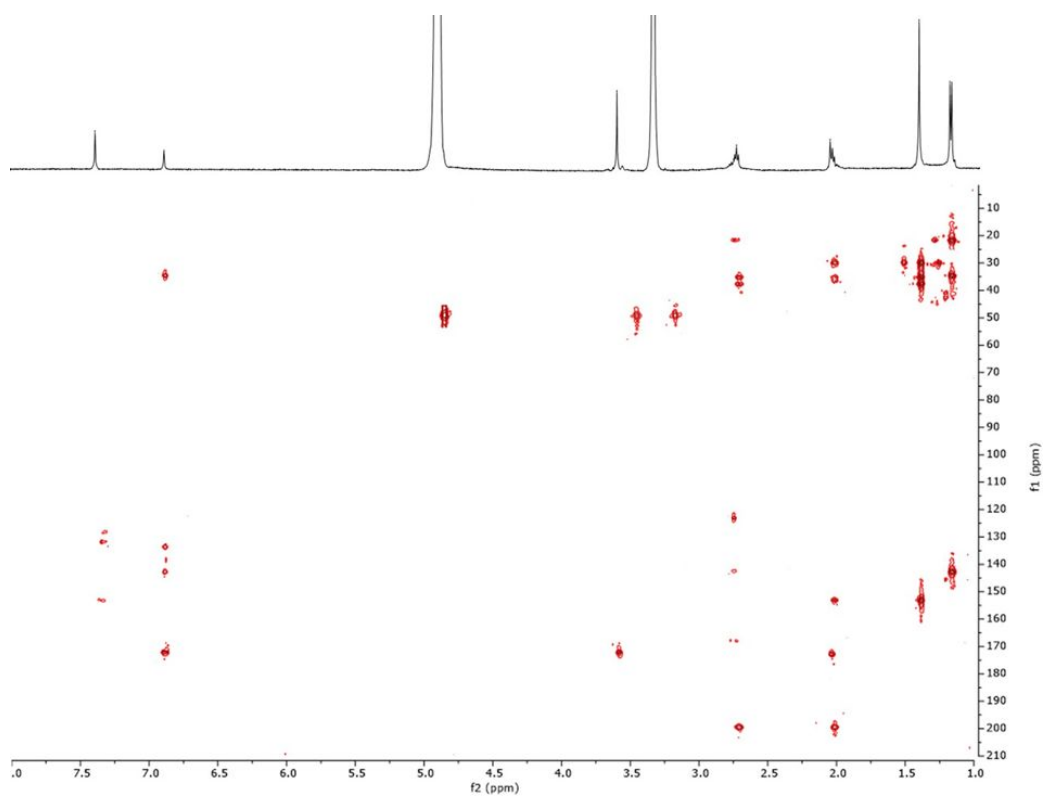

**Figure S12.** HMBC Spectrum (CD<sub>3</sub>OD) of compound **9**.

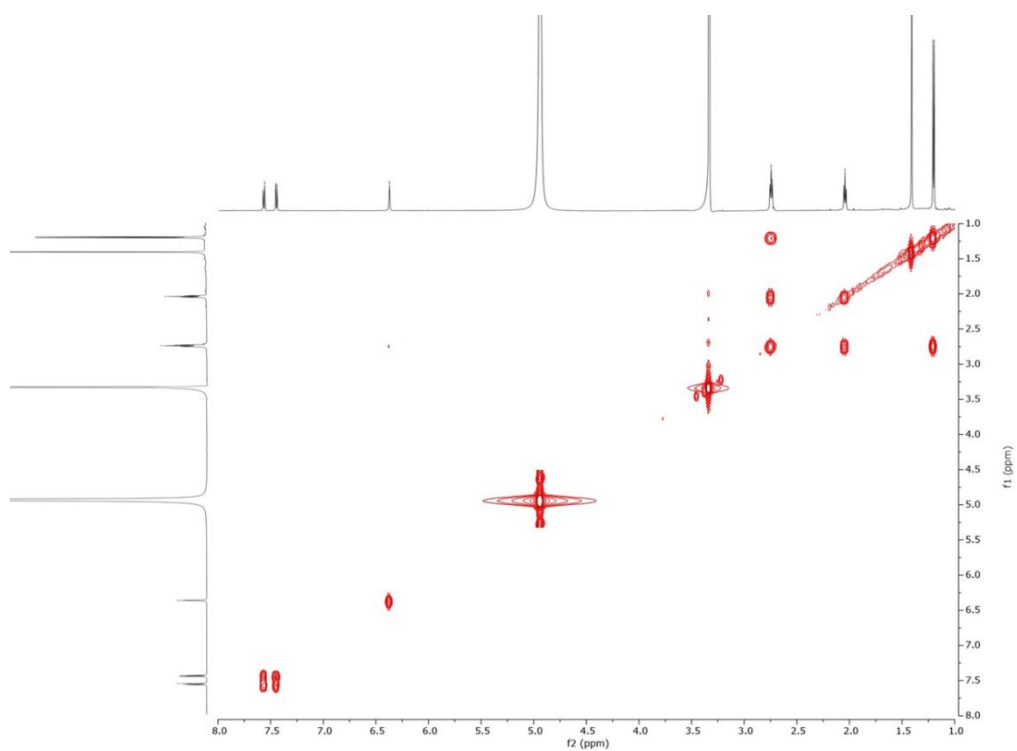

**Figure S13.** COSY Spectrum ( $\text{CD}_3\text{OD}$ ) of compound **9**.

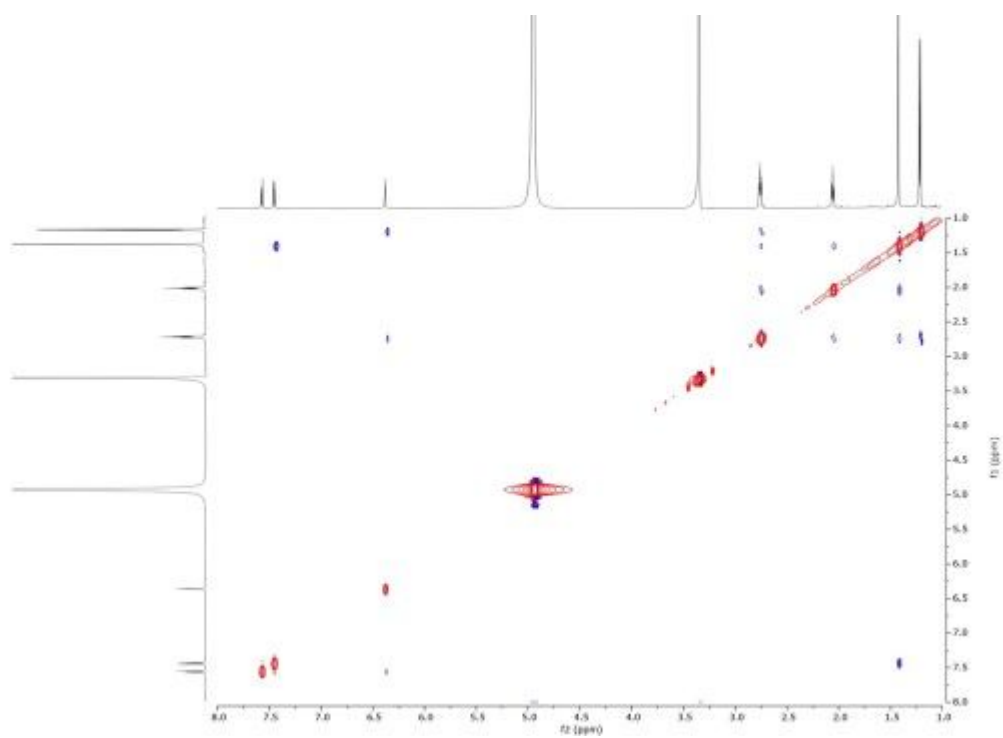

**Figure S14.** ROESY Spectrum ( $\text{CD}_3\text{OD}$ ) of compound **9**

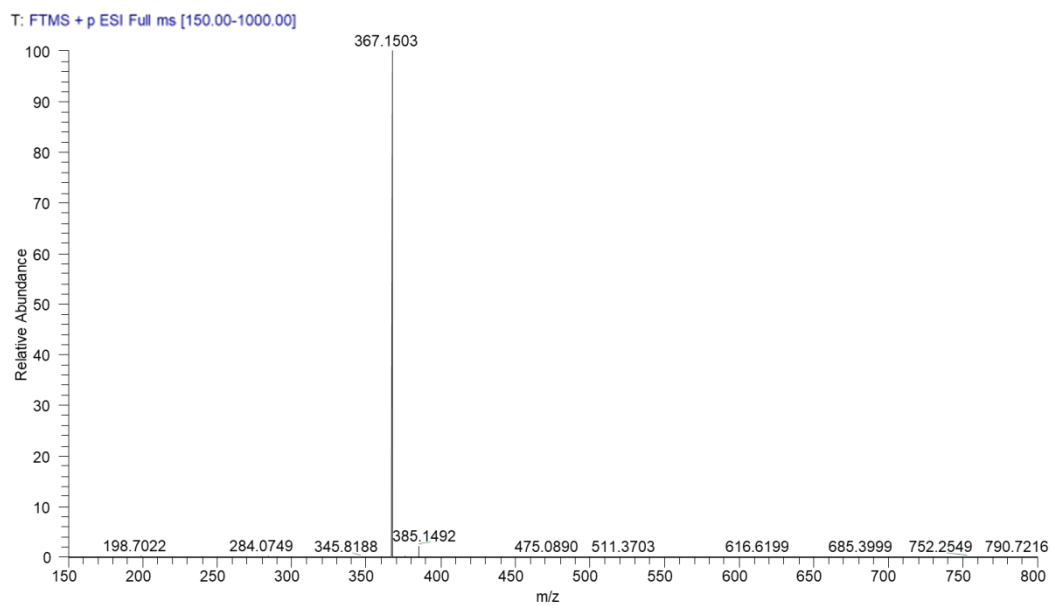

**Figure S15.** ESI/LTQOrbitrap spectrum of compound **10**, in positive ion mode.

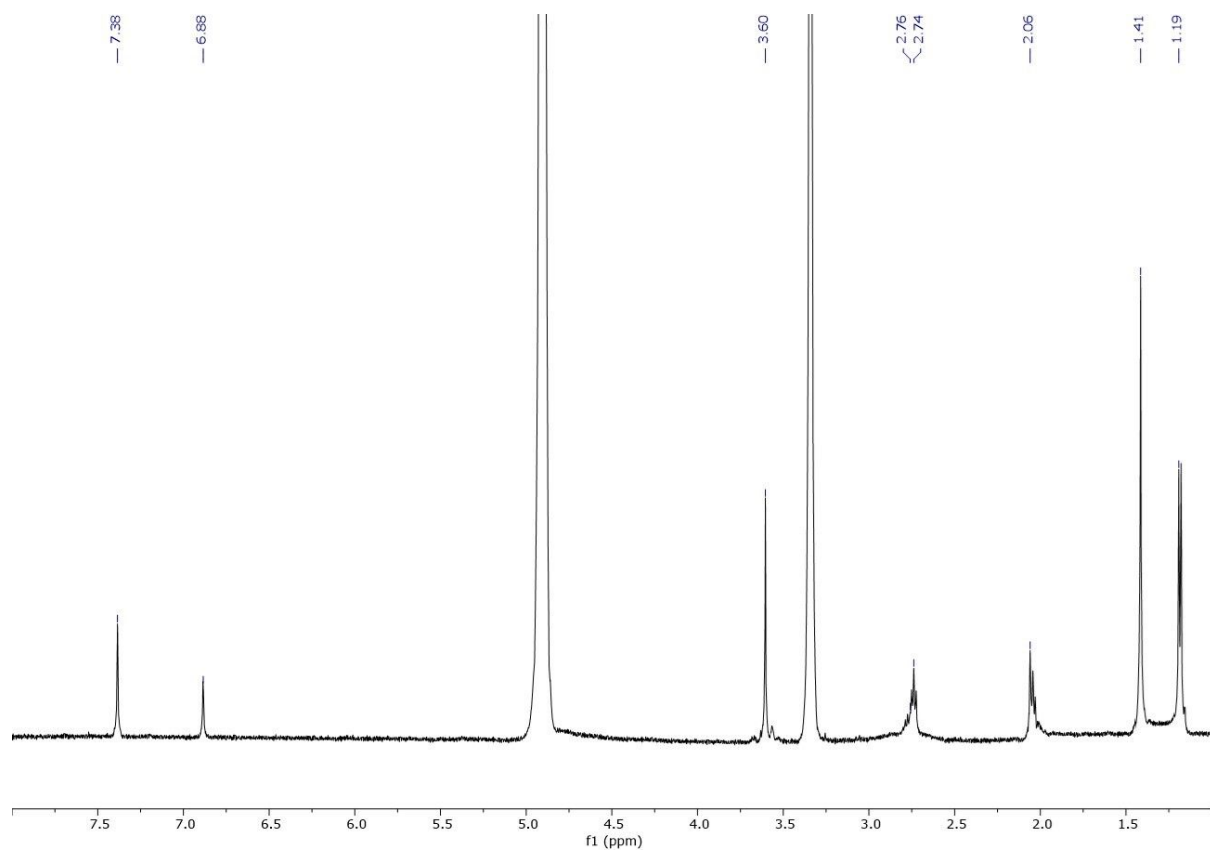

**Figure S16.**  $^1\text{H}$  NMR Spectrum (600 MHz,  $\text{CD}_3\text{OD}$ ) of compound **10**.

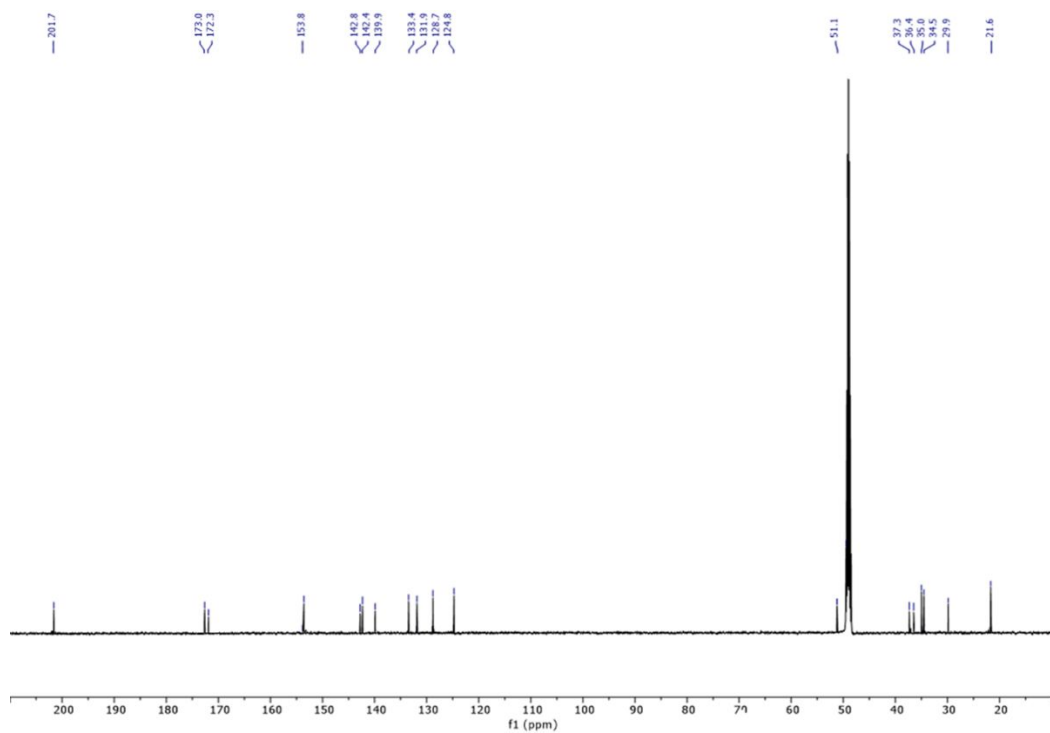

**Figure S17.**  $^{13}\text{C}$  Spectrum (150 MHz,  $\text{CD}_3\text{OD}$ ) of compound **10**.

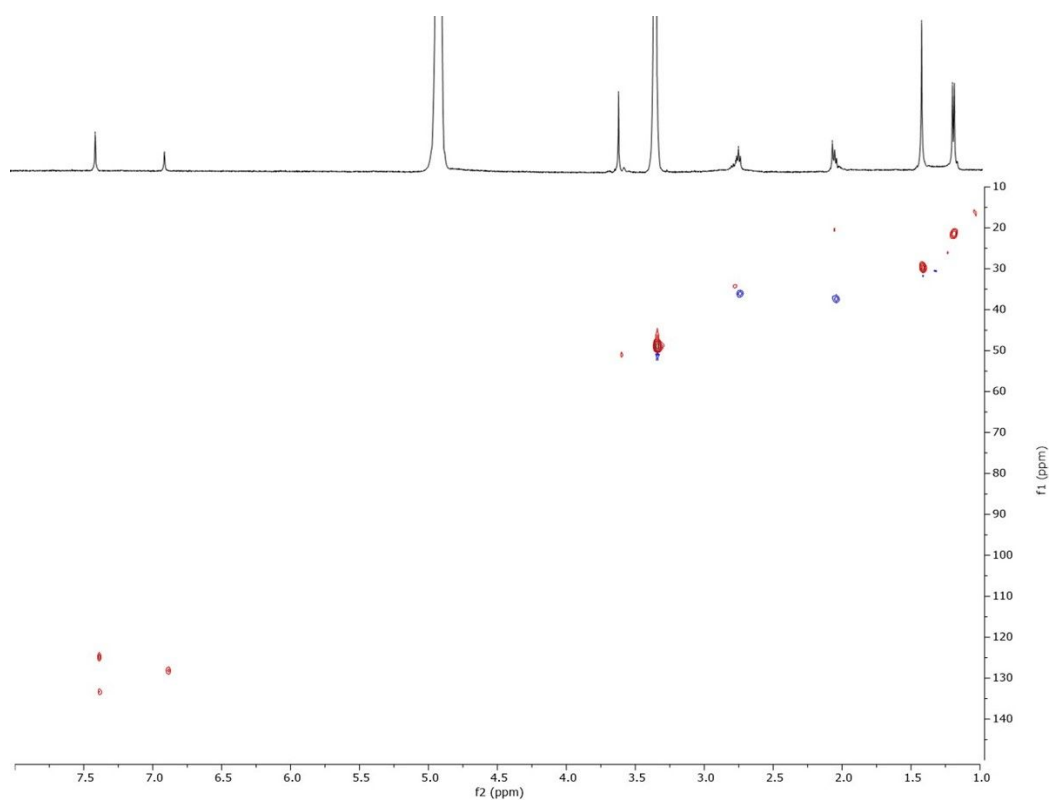

**Figure S18.** HSQC Spectrum ( $\text{CD}_3\text{OD}$ ) of compound **10**.

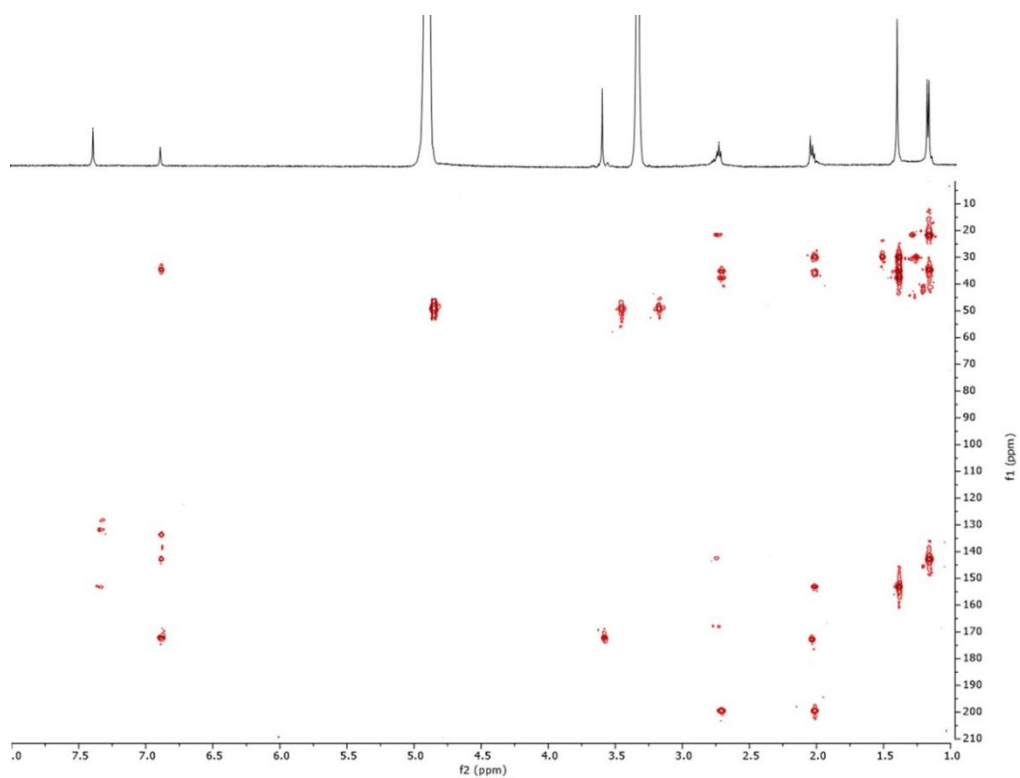

**Figure S19.** HMBC Spectrum ( $\text{CD}_3\text{OD}$ ) of compound **10**.

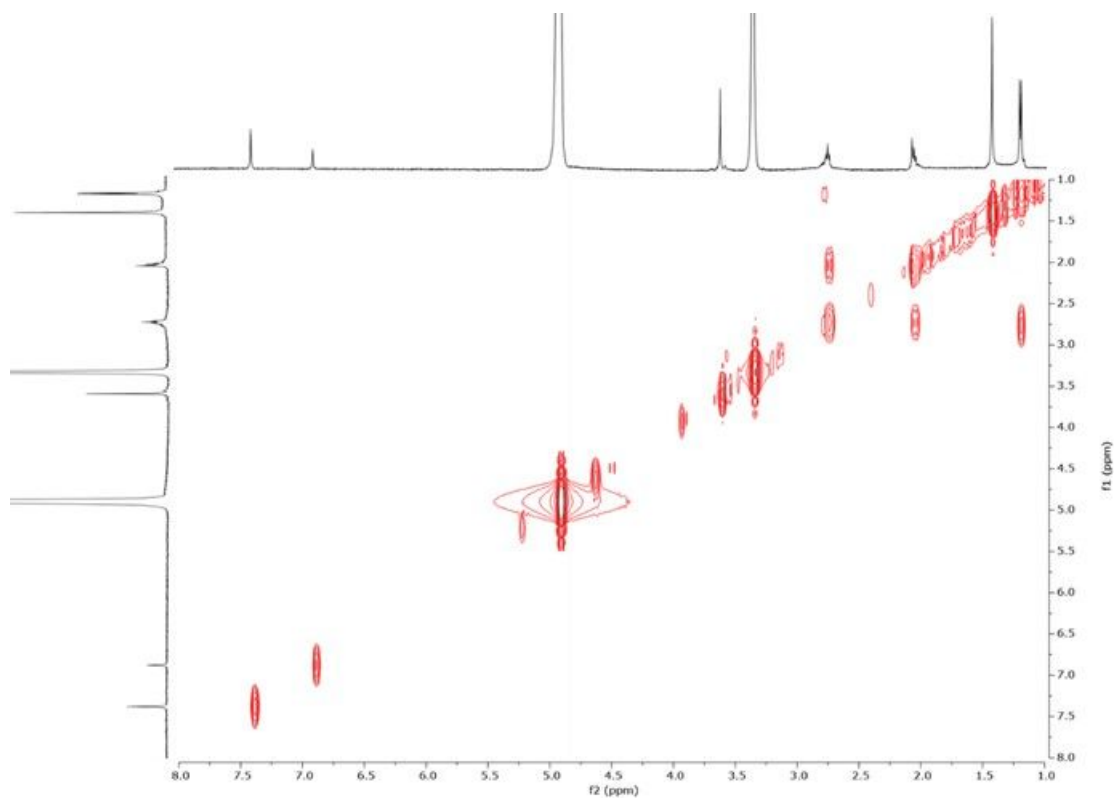

**Figure S20.** COSY Spectrum ( $\text{CD}_3\text{OD}$ ) of compound **10**.

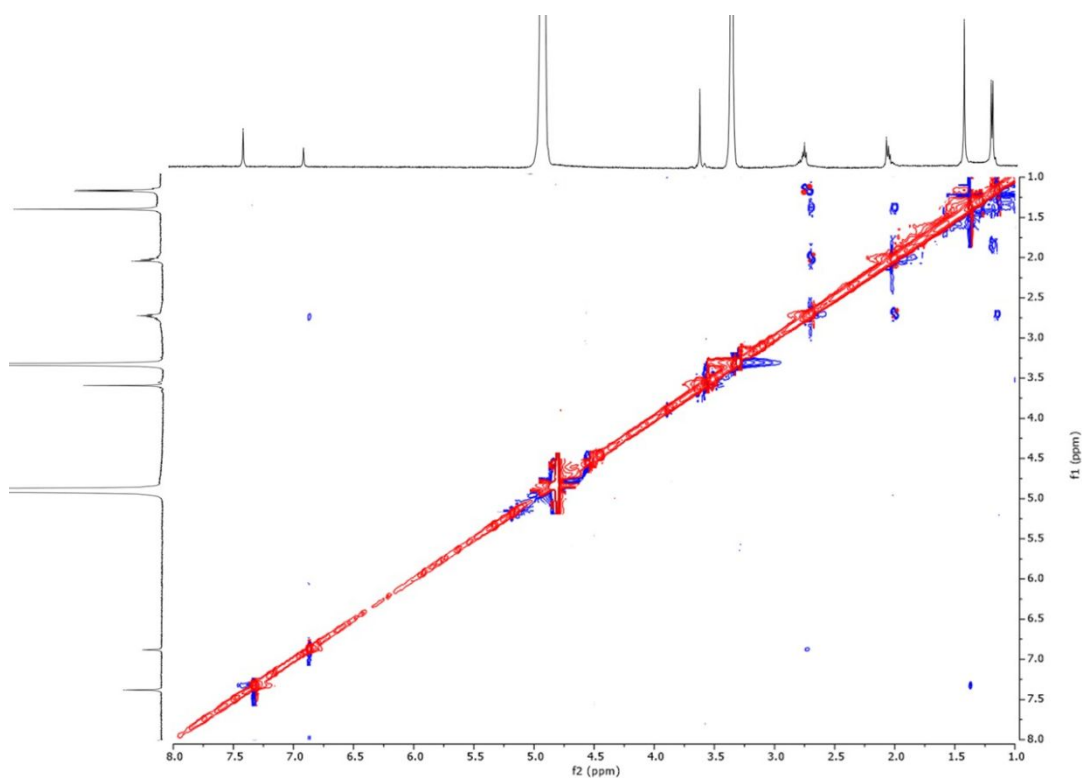

**Figure S21.** ROESY Spectrum ( $\text{CD}_3\text{OD}$ ) of compound **10**.

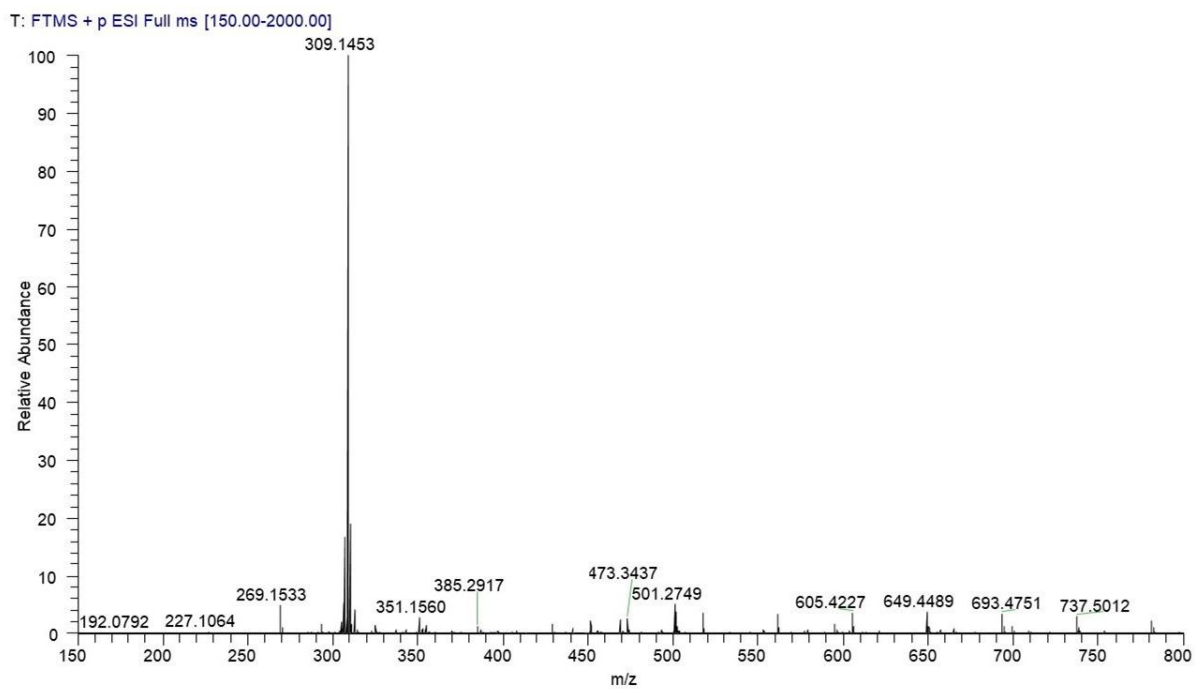

**Figure S22.** ESI/LTQ Orbitrap spectrum of compound **11**, in negative ion mode.

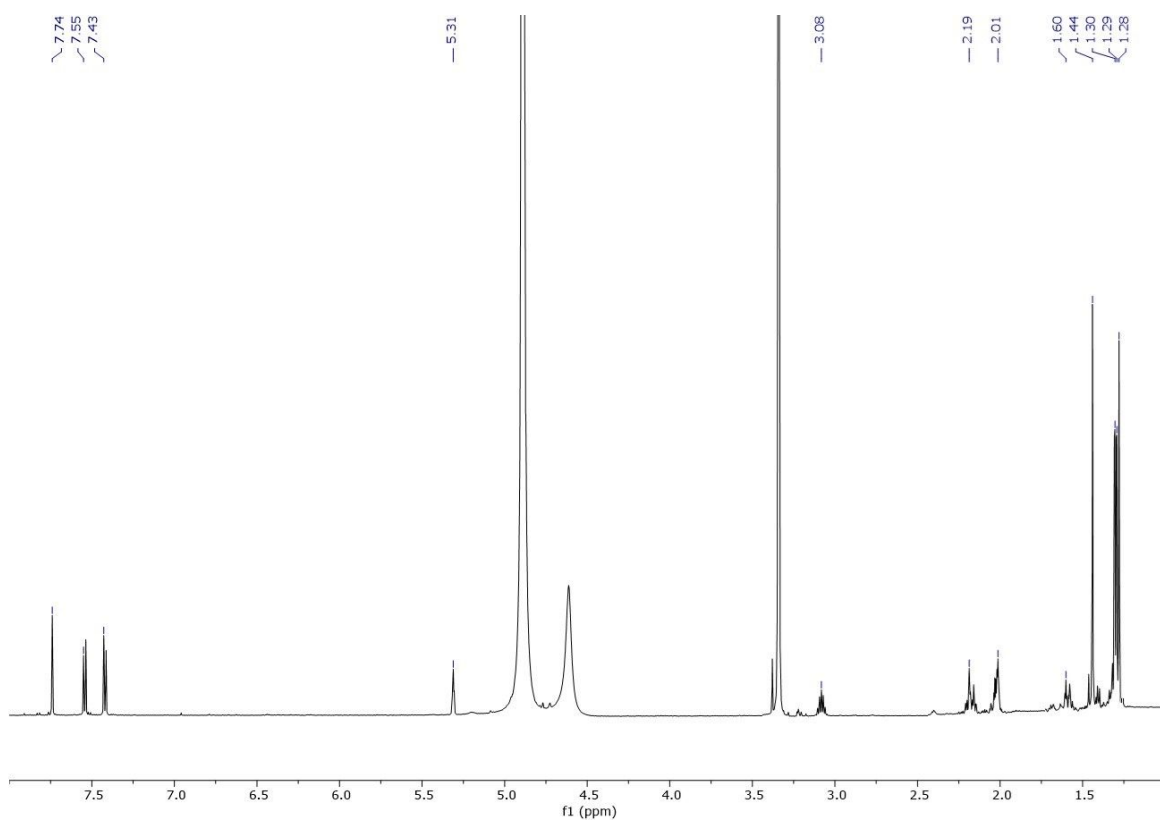

**Figure S23.**  $^1\text{H}$  NMR Spectrum (600 MHz,  $\text{CD}_3\text{OD}$ ) of compound **11**.

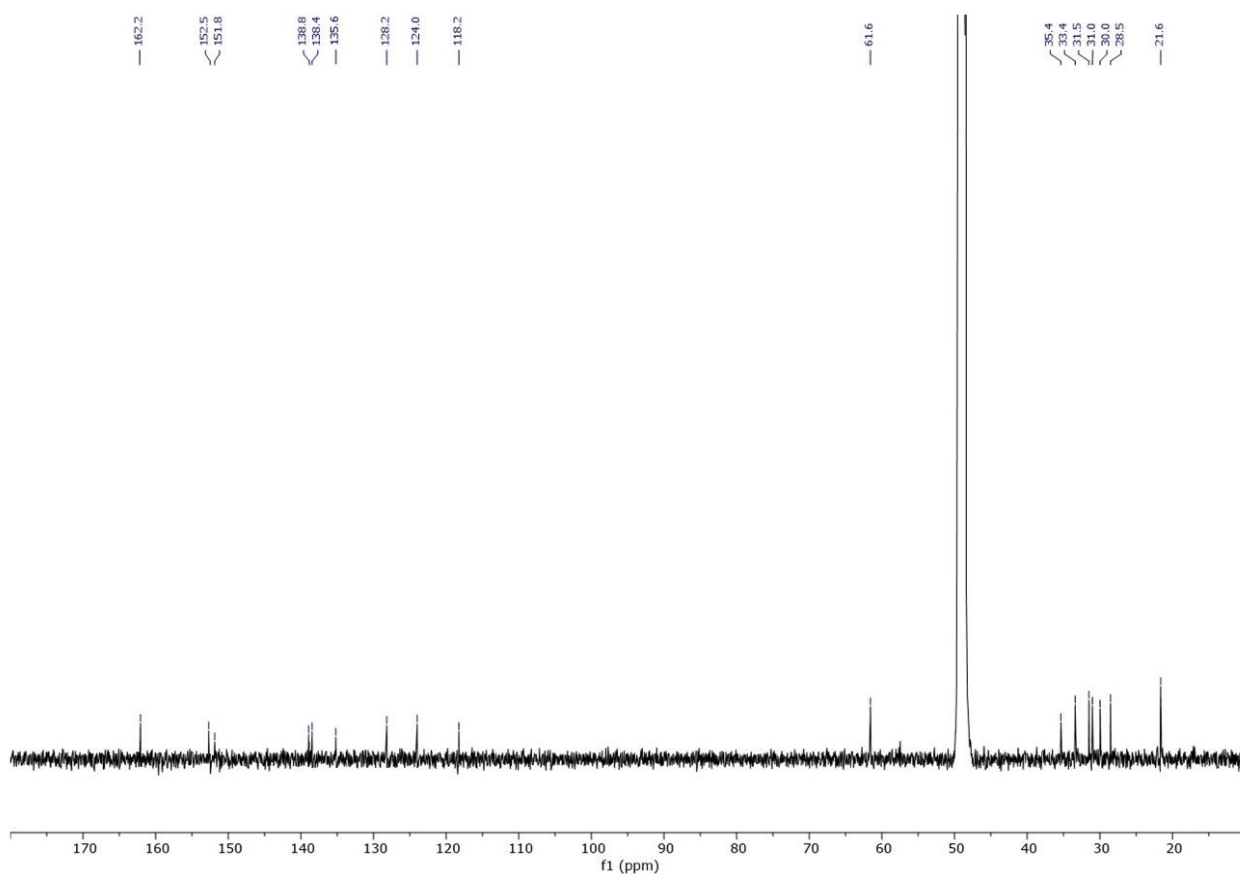

**Figure S24.**  $^{13}\text{C}$  NMR Spectrum (150 MHz,  $\text{CD}_3\text{OD}$ ) of compound **11**.



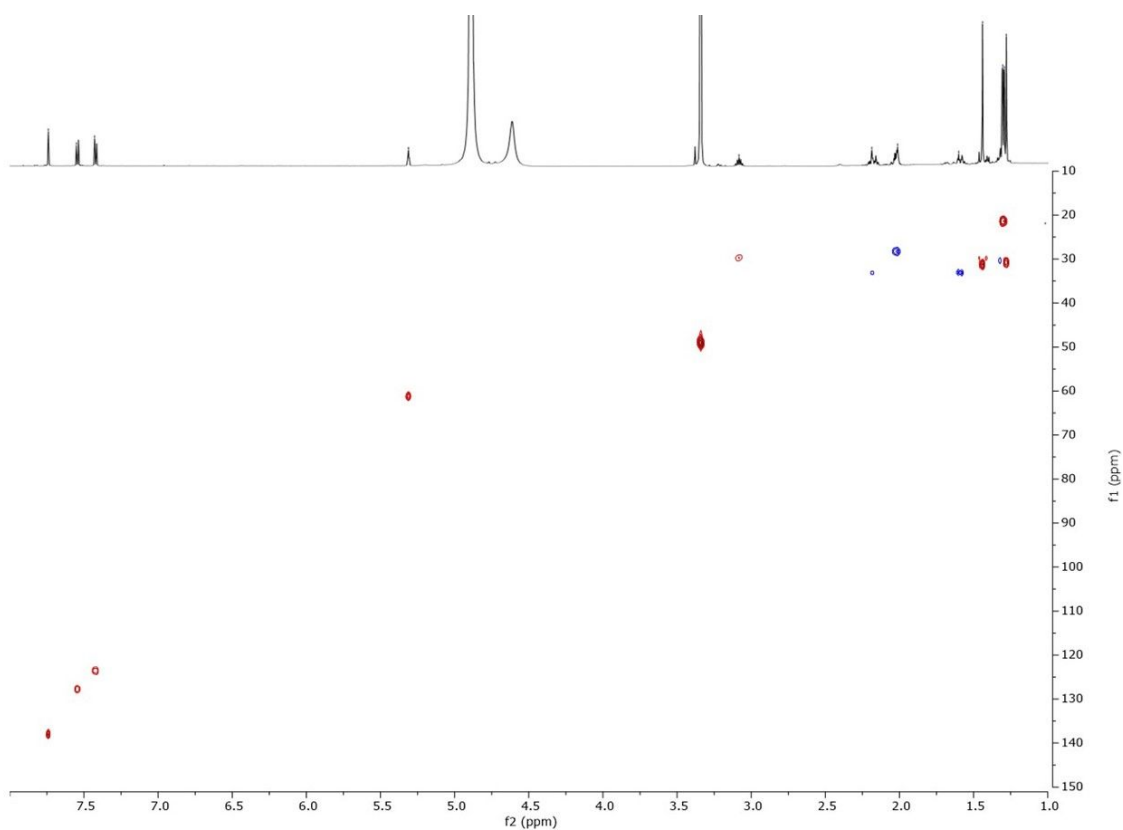

**Figure S25.** HSQC Spectrum ( $\text{CD}_3\text{OD}$ ) of compound **11**.

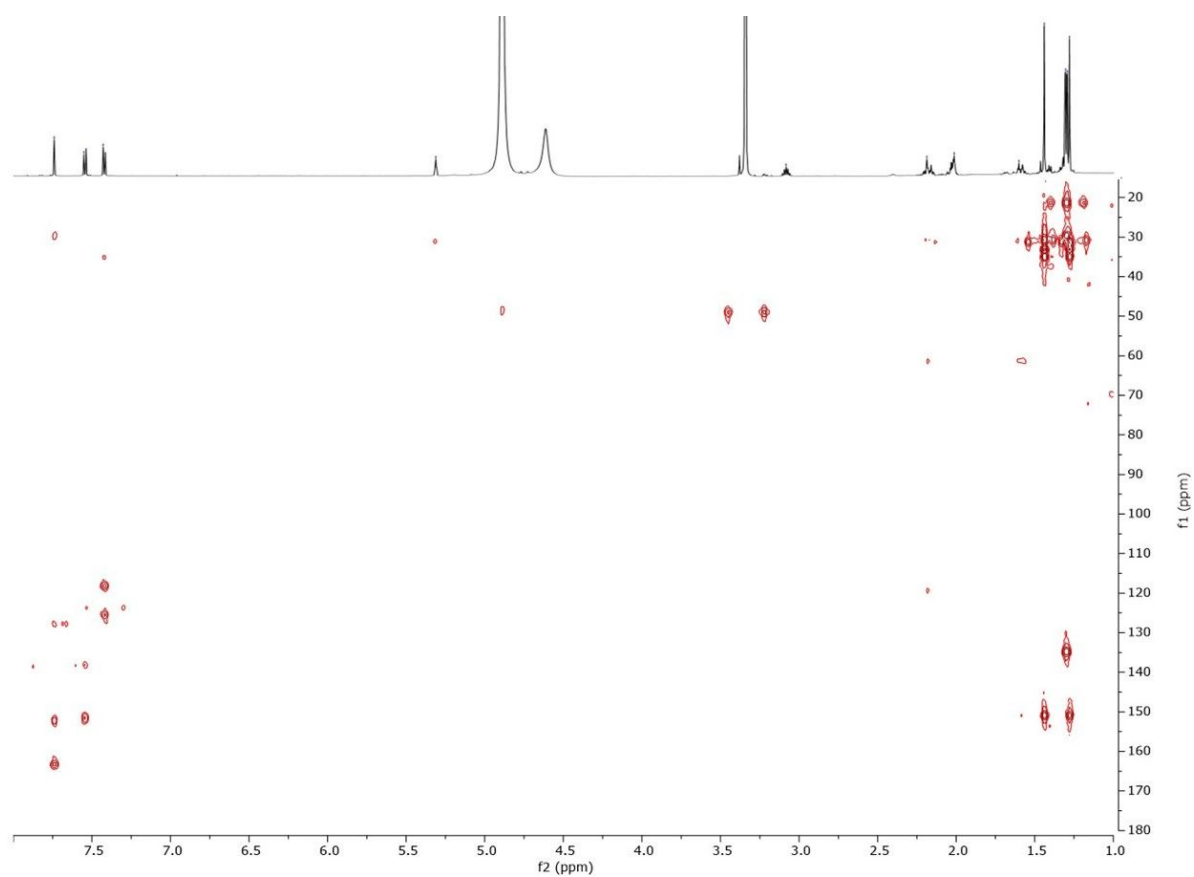

**Figure S26.** HMBC Spectrum ( $\text{CD}_3\text{OD}$ ) of compound **11**.

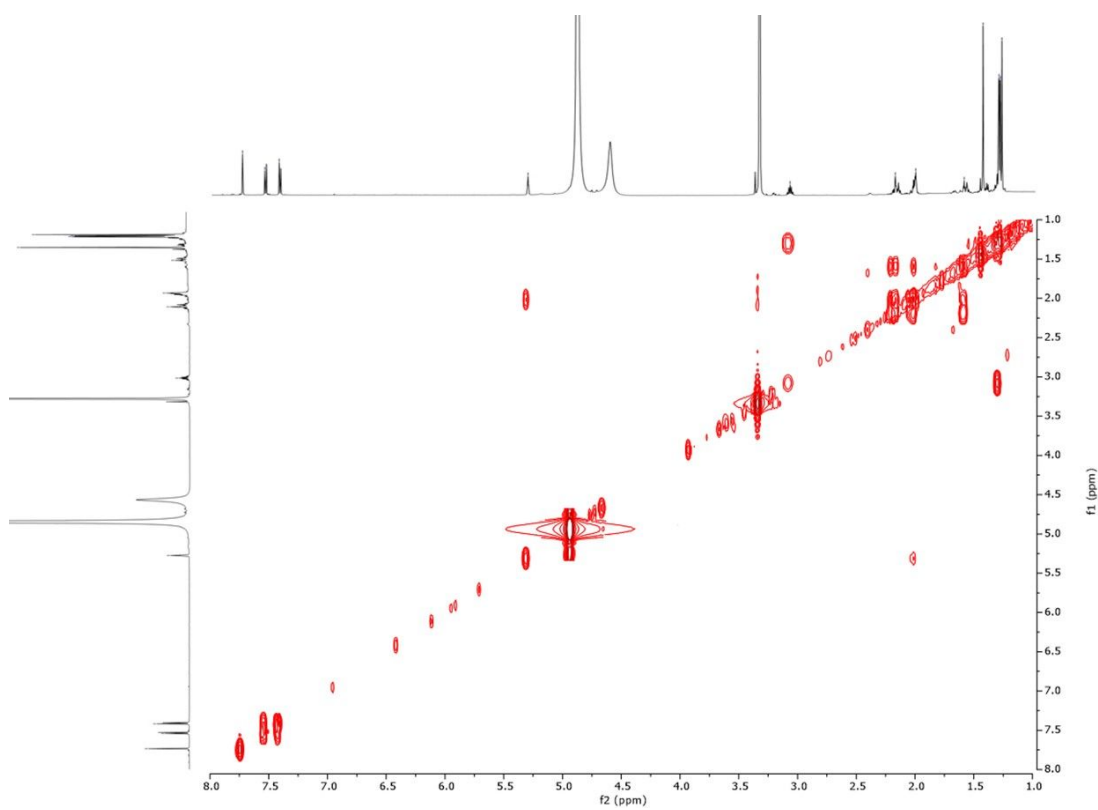

**Figure S27.** COSY Spectrum ( $\text{CD}_3\text{OD}$ ) of compound **11**.

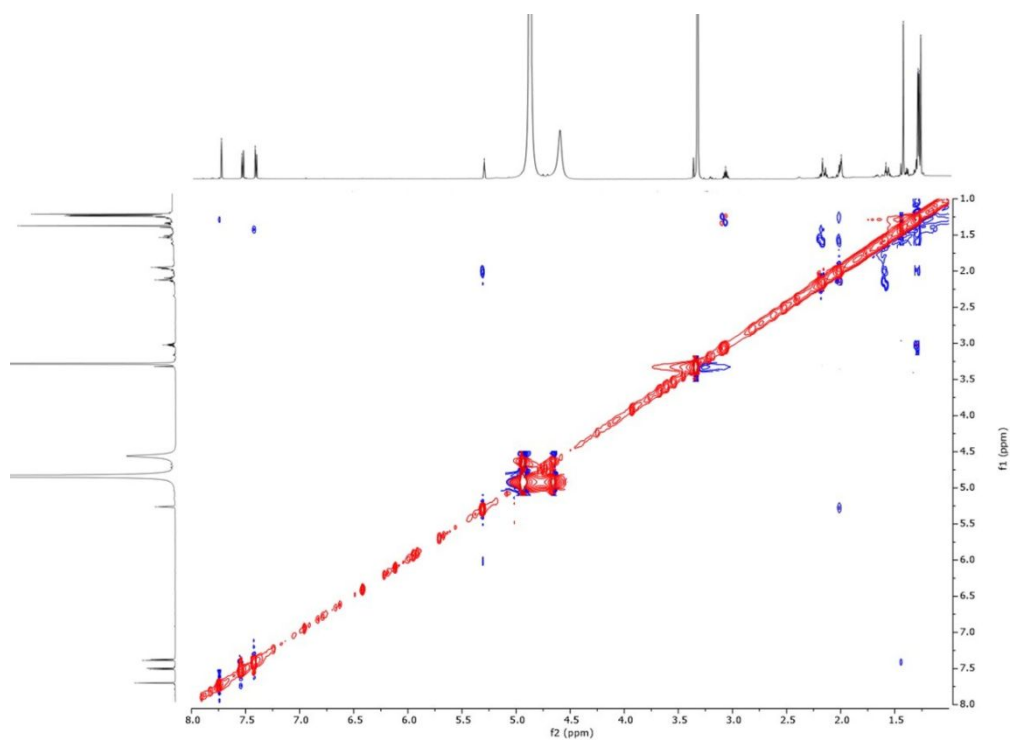

**Figure S28.** ROESY Spectrum ( $\text{CD}_3\text{OD}$ ) of compound **11**.

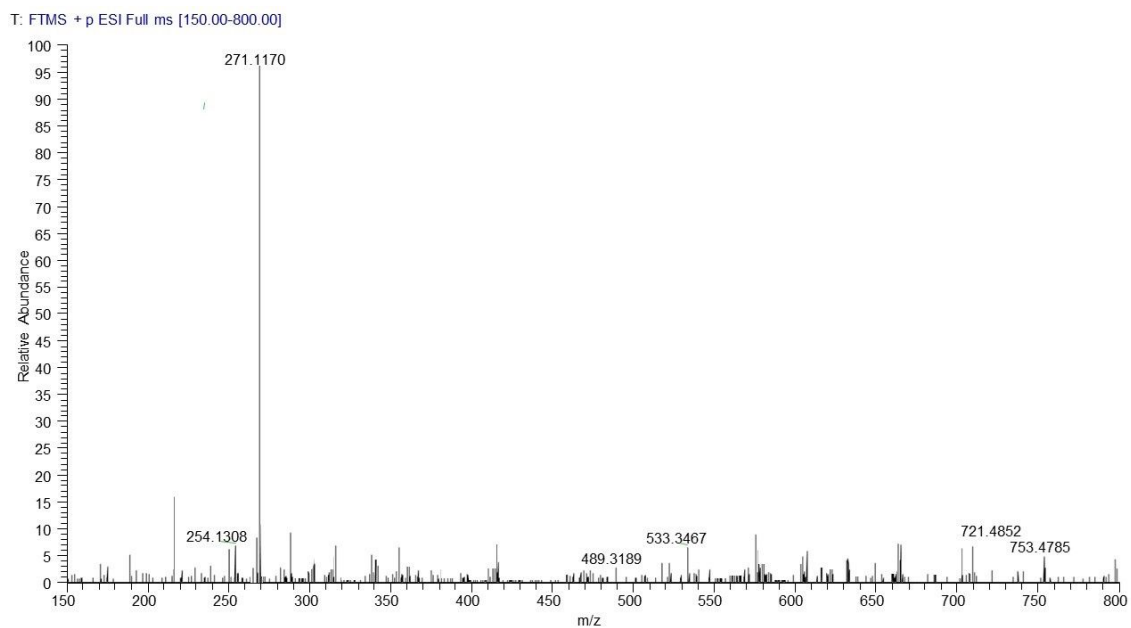

**Figure S29.** ESI/LTQ Orbitrap spectrum of compound **16**, in negative ion mode.

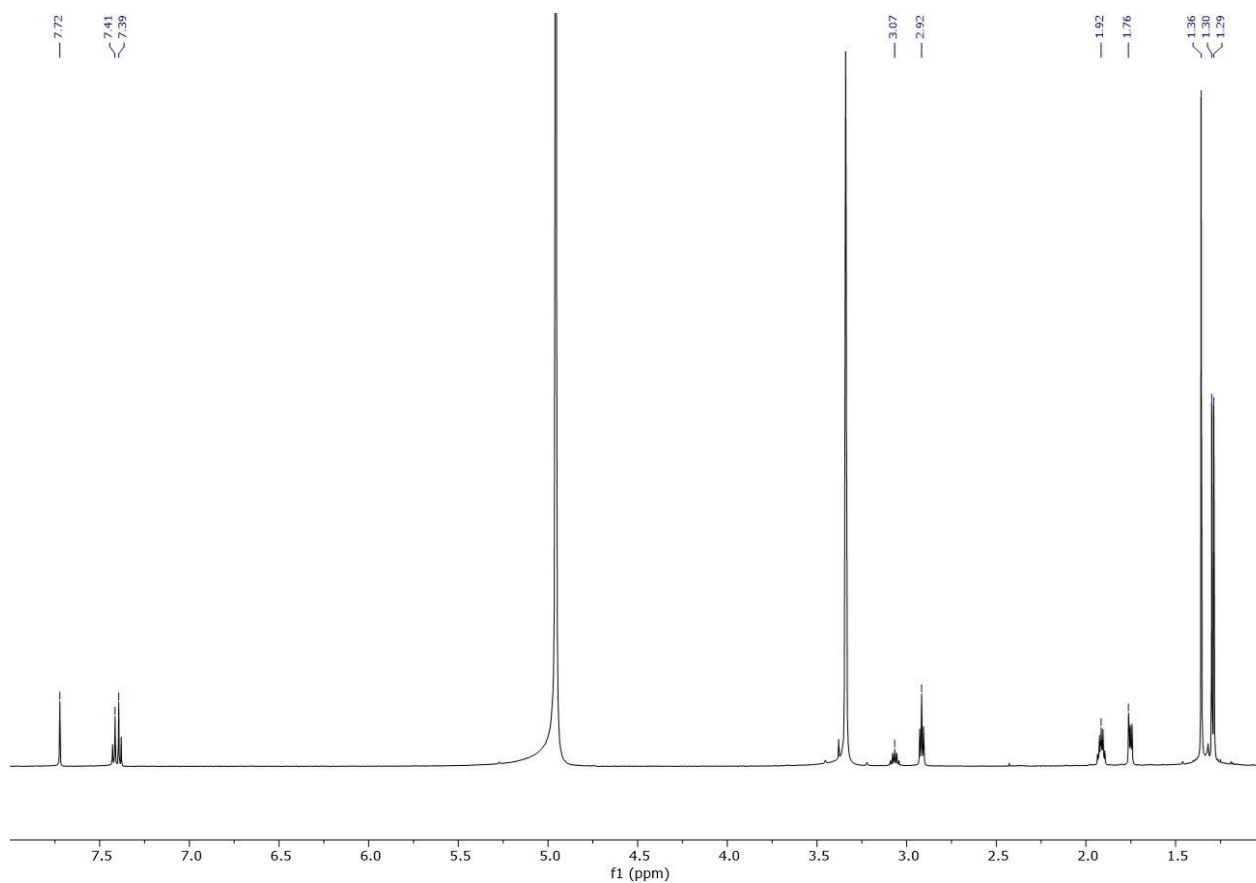

**Figure S30.**  $^1\text{H}$  NMR Spectrum (600 MHz,  $\text{CD}_3\text{OD}$ ) of compound **16**.

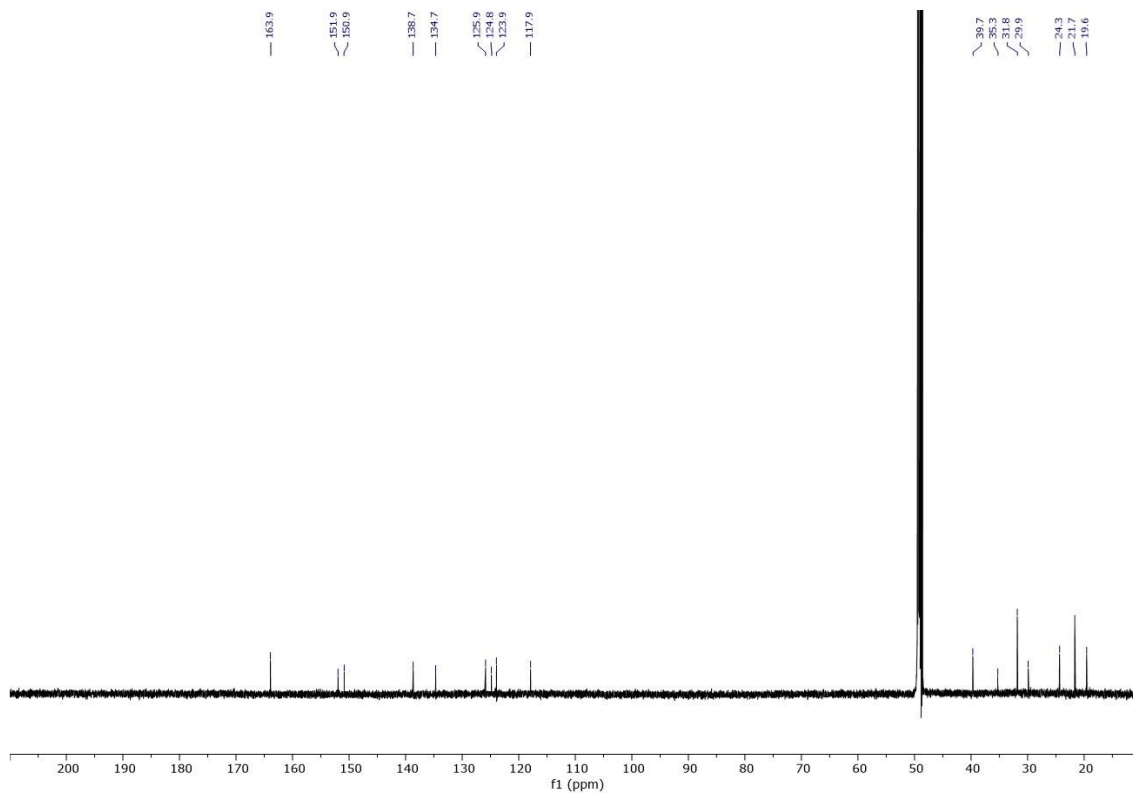

**Figure S31.**  $^{13}\text{C}$  Spectrum (150 MHz,  $\text{CD}_3\text{OD}$ ) of compound **16**.

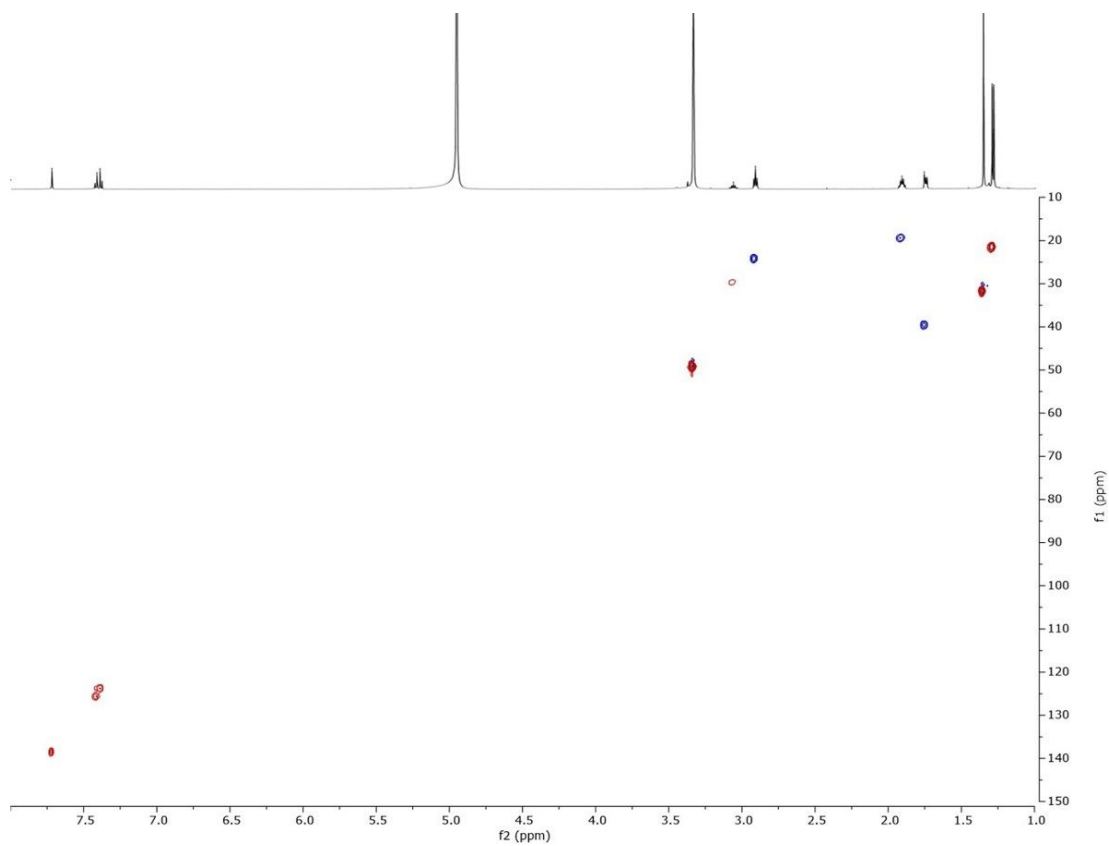

**Figure S32.** HSQC Spectrum ( $\text{CD}_3\text{OD}$ ) of compound **16**.

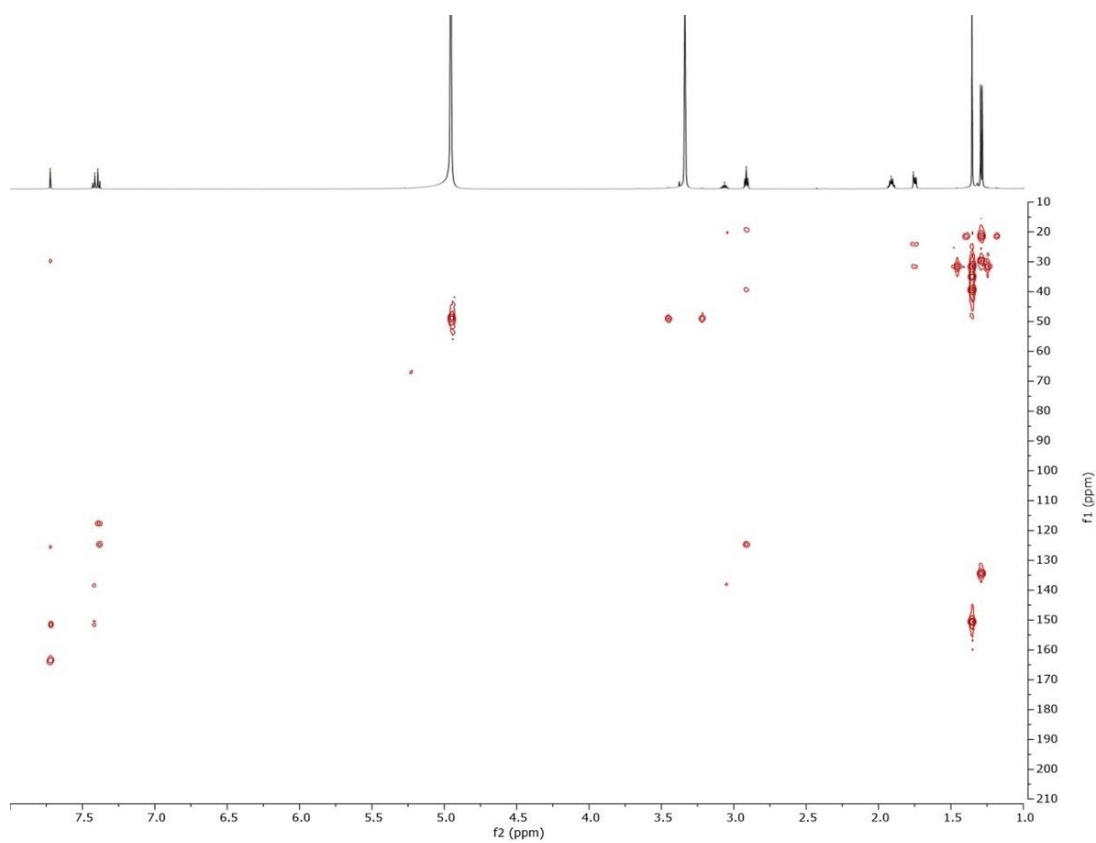

**Figure S33.** HMBC Spectrum ( $\text{CD}_3\text{OD}$ ) of compound **16**.

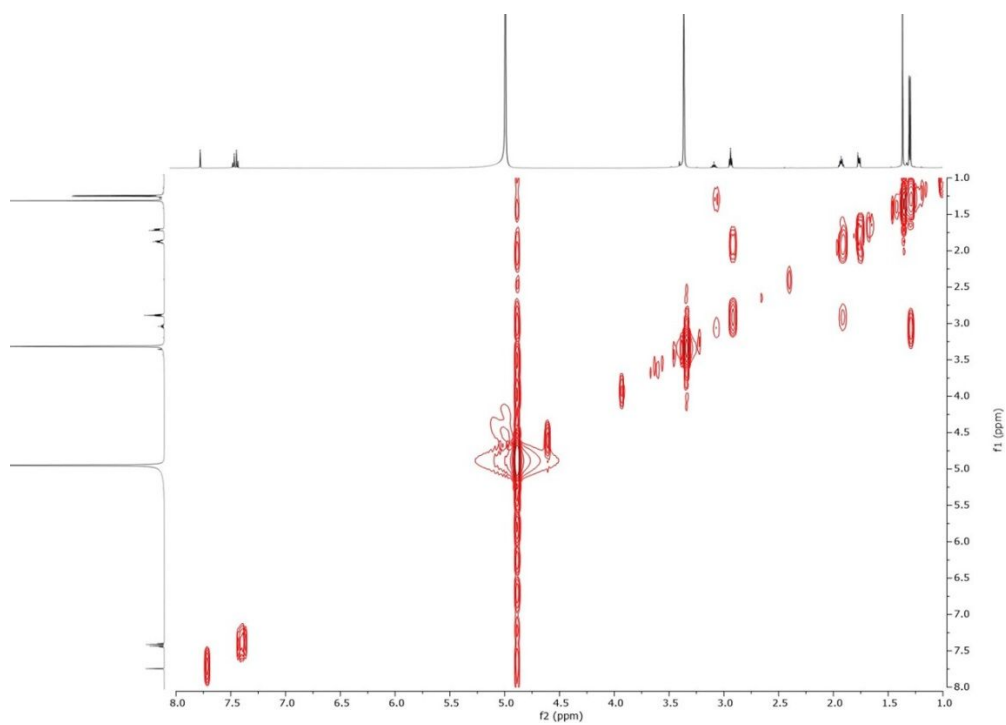

**Figure S34.** COSY Spectrum ( $\text{CD}_3\text{OD}$ ) of compound **16**.

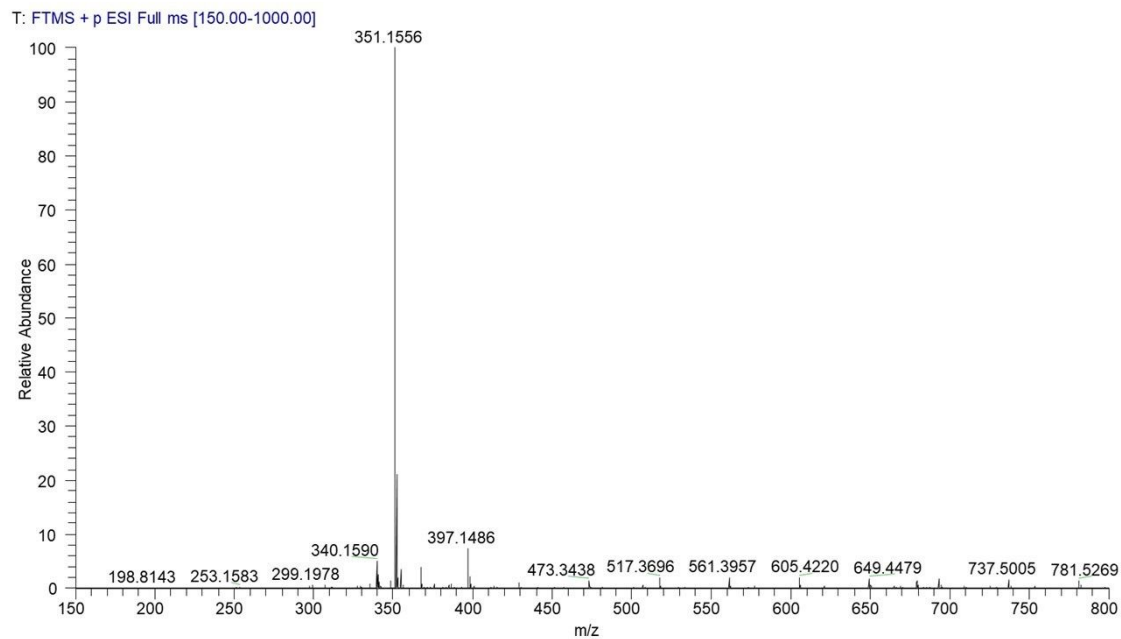

**Figure S36.** ESI/LTQOrbitrap spectrum of compound **20**, in negative ion mode.

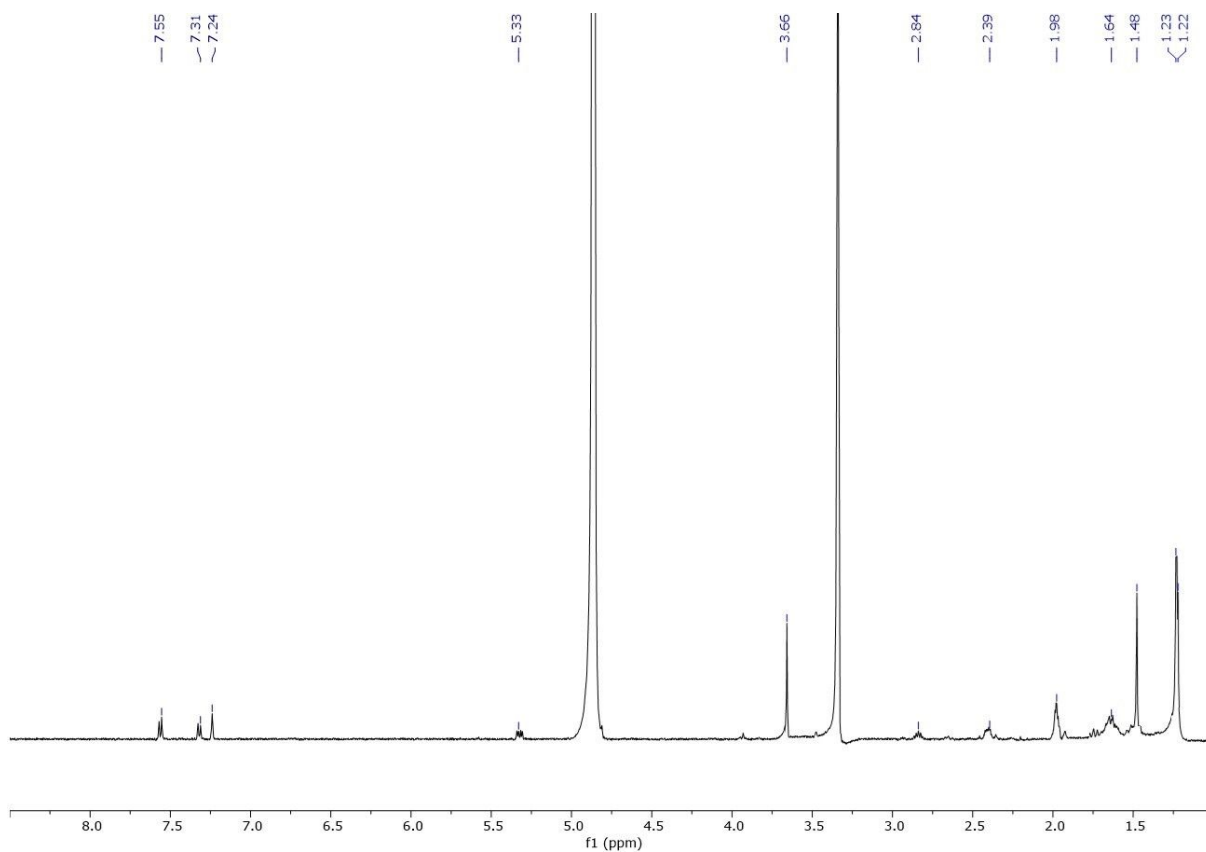

**Figure S37.**  $^1\text{H}$  NMR Spectrum (600 MHz,  $\text{CD}_3\text{OD}$ ) of compound **20**.

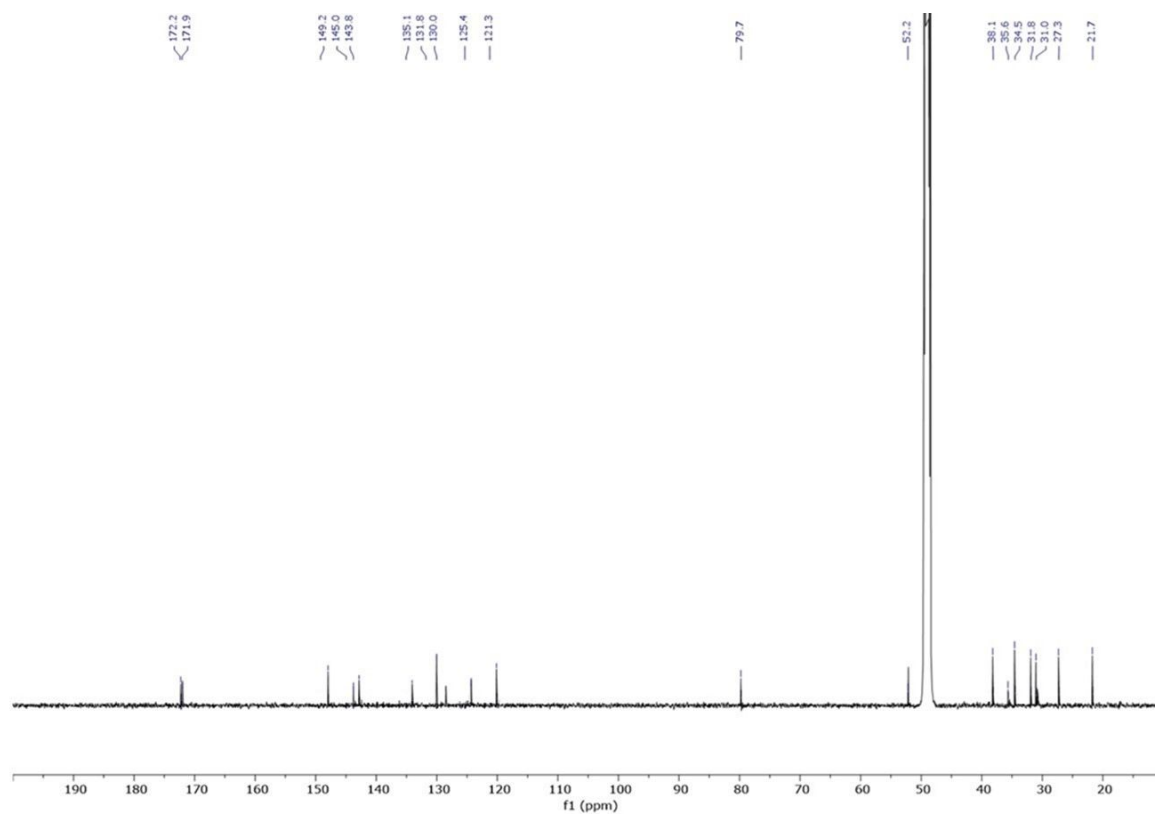

**Figure S38.**  $^{13}\text{C}$  Spectrum (150 MHz,  $\text{CD}_3\text{OD}$ ) of compound **20**.

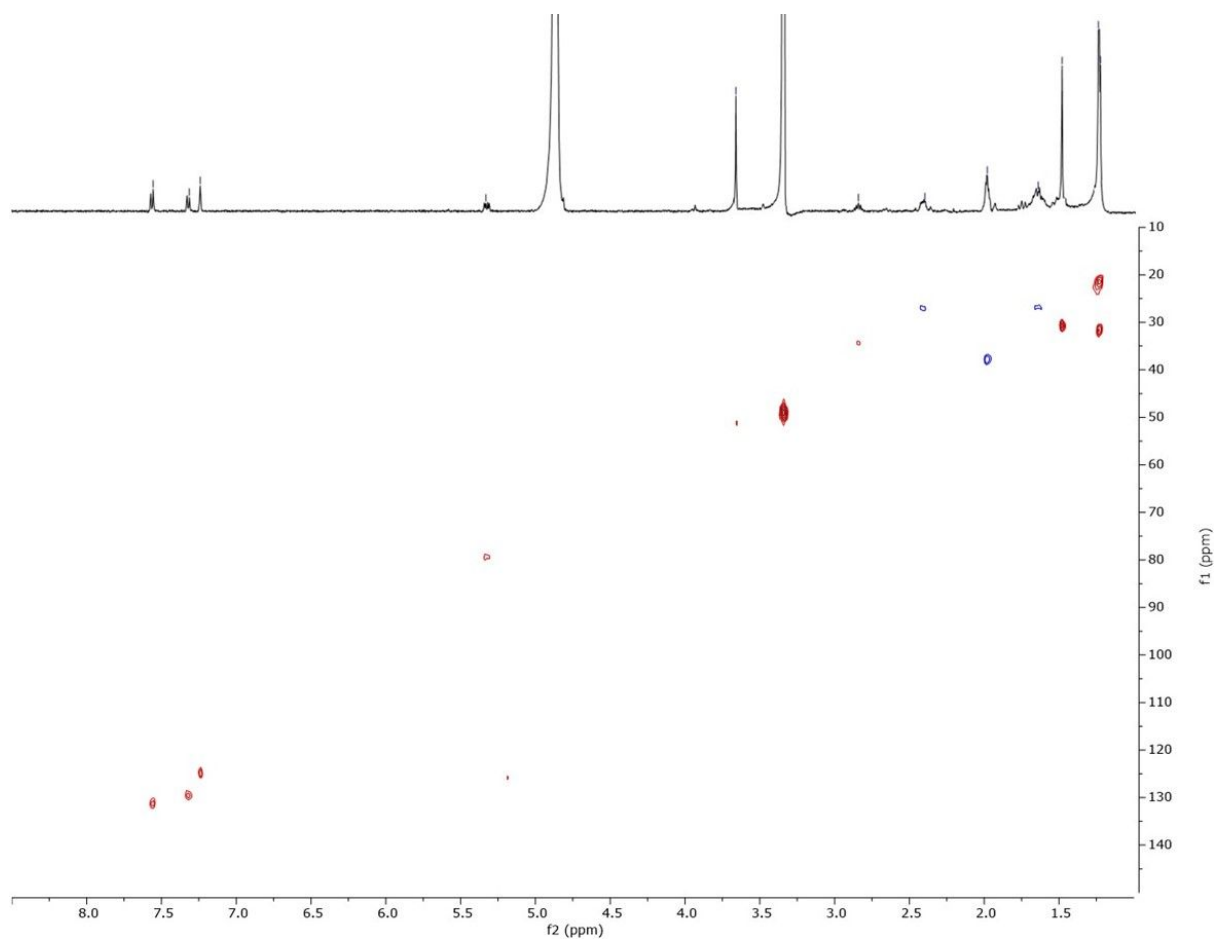

**Figure S39.** HSQC Spectrum ( $\text{CD}_3\text{OD}$ ) of compound **20**.

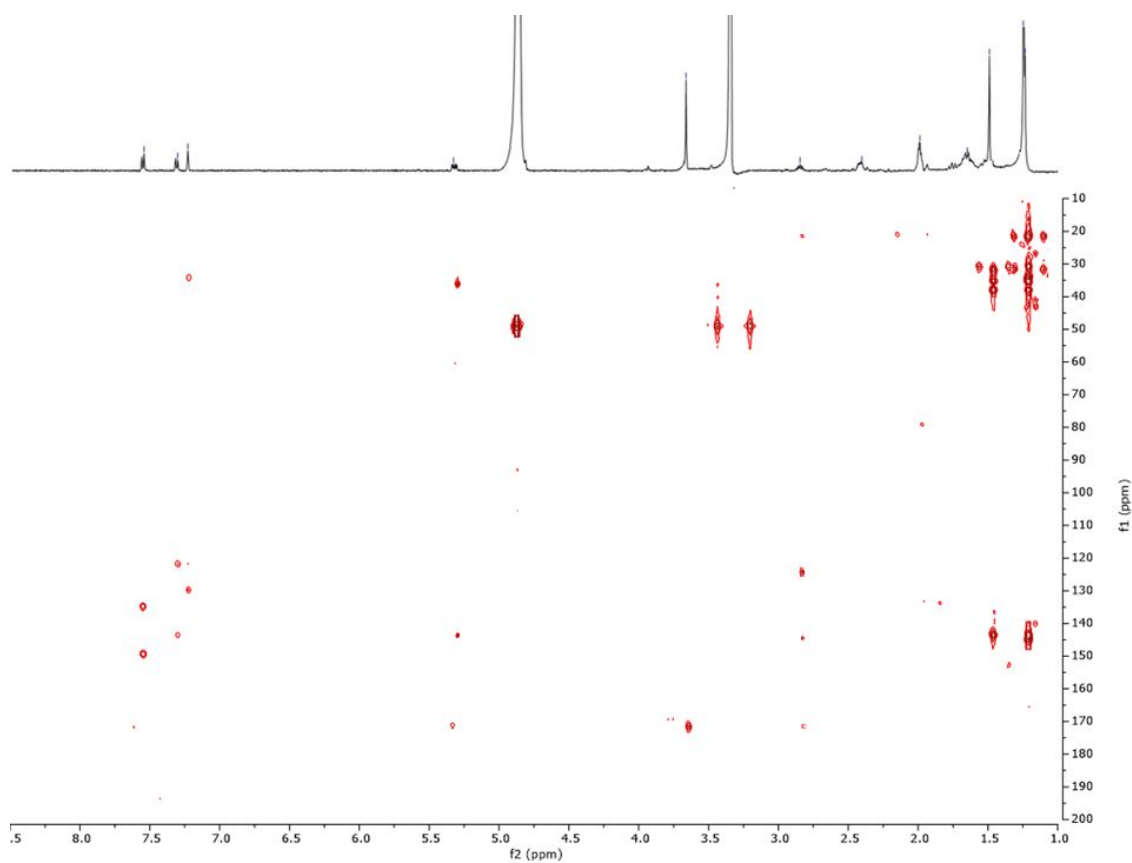

**Figure S40.** HMBC Spectrum (CD<sub>3</sub>OD) of compound **20**.

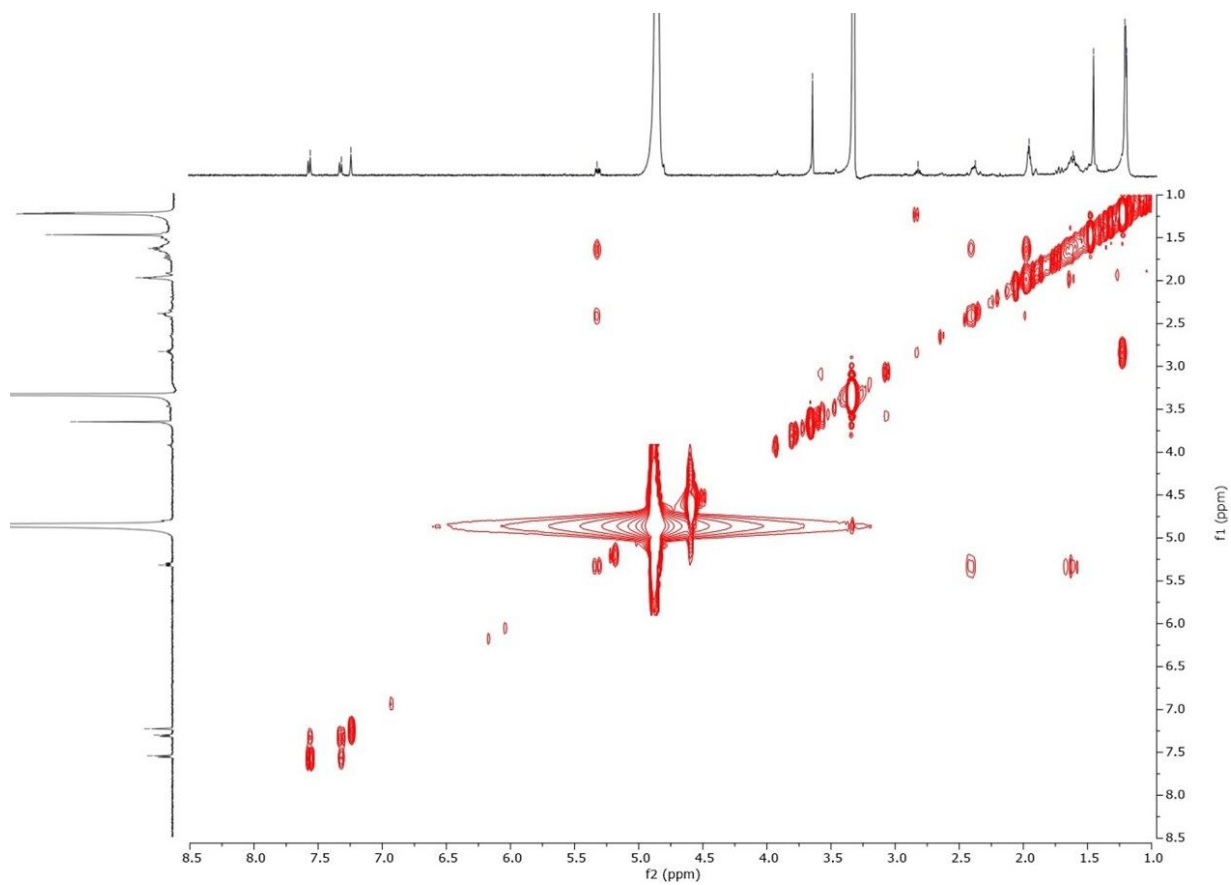

**Figure S41.** COSY Spectrum (CD<sub>3</sub>OD) of compound **20**.
